1 **Ceragenins and antimicrobial peptides kill bacteria through distinct mechanisms**

2

3 Gabriel Mitchell<sup>1§</sup>, Melanie R. Silvis<sup>2</sup>, Kelsey C. Talkington<sup>1</sup>, Jonathan M. Budzik<sup>1,3</sup>,  
4 Claire E. Dodd<sup>1</sup>, Justin M. Paluba<sup>1</sup>, Erika A. Oki<sup>1</sup>, Kristine L. Trotta<sup>4</sup>, Daniel J. Licht<sup>1</sup>,  
5 David Jimenez-Morales<sup>5,6</sup>, Seemay Chou<sup>4</sup>, Paul B. Savage<sup>7</sup>, Carol A. Gross<sup>2,8</sup>, Michael  
6 A. Marletta<sup>1,9,10#</sup> and Jeffery S. Cox<sup>1#</sup>

7

8

9 **Running title:** Ceragenins kill bacteria through a distinct mechanism

10 **Keywords:** Antibiotics, Gram-negative, Gram-positive, mycobacteria, CSA

11

12

13 <sup>1</sup>Department of Molecular and Cell Biology, University of California, Berkeley, USA.

14 <sup>2</sup>Department of Microbiology and Immunology, University of California, San Francisco,  
15 USA.

16 <sup>3</sup>Department of Medicine, University of California, San Francisco, USA.

17 <sup>4</sup>Department of Biochemistry and Biophysics, University of California, San Francisco,  
18 USA.

19 <sup>5</sup>Department of Medicine, Division of Cardiovascular Medicine, Stanford University,  
20 CA, USA.

21 <sup>6</sup>Department of Cellular and Molecular Pharmacology, University of California, San  
22 Francisco, USA.

23 <sup>7</sup>Department of Chemistry and Biochemistry, Brigham Young University, Provo, Utah,  
24 USA.

25 <sup>8</sup>Department of Cell and Tissue Biology, University of California, San Francisco, USA.

26 <sup>9</sup>Department of Chemistry, University of California, Berkeley, USA.

27 <sup>10</sup>California Institute for Quantitative Biosciences, University of California, Berkeley,  
28 USA.

29 #Corresponding authors: [jeff.cox@berkeley.edu](mailto:jeff.cox@berkeley.edu); [marletta@berkeley.edu](mailto:marletta@berkeley.edu)

30 §Current address: Open Innovation @ NITD, Novartis Institute for Tropical Diseases,  
31 Emeryville, CA, USA.

32 **ABSTRACT**

33 Ceragenins are a family of synthetic amphipathic molecules designed to mimic the  
34 properties of naturally-occurring cationic antimicrobial peptides (CAMPs). Although  
35 ceragenins have potent antimicrobial activity, whether their mode of action is similar to  
36 that of CAMPs has remained elusive. Here we report the results of a comparative study of  
37 the bacterial responses to two well-studied CAMPs, LL37 and colistin, and two  
38 ceragenins with related structures, CSA13 and CSA131. Using transcriptomic and  
39 proteomic analyses, we found that *Escherichia coli* responds similarly to both CAMPs  
40 and ceragenins by inducing a Cpx envelope stress response. However, whereas *E. coli*  
41 exposed to CAMPs increased expression of genes involved in colanic acid biosynthesis,  
42 bacteria exposed to ceragenins specifically modulated functions related to phosphate  
43 transport, indicating distinct mechanisms of action between these two classes of  
44 molecules. Although traditional genetic approaches failed to identify genes that confer  
45 high-level resistance to ceragenins, using a Clustered Regularly Interspaced Short  
46 Palindromic Repeats interference (CRISPRi) approach we identified *E. coli* essential  
47 genes that when knocked down modify sensitivity to these molecules. Comparison of the  
48 essential gene-antibiotic interactions for each of the CAMPs and ceragenins identified  
49 both overlapping and distinct dependencies for their antimicrobial activities. Overall, this  
50 study indicates that while some bacterial responses to ceragenins overlap with those  
51 induced by naturally-occurring CAMPs, these synthetic molecules target the bacterial  
52 envelope using a distinctive mode of action.

53 **IMPORTANCE**

54 The development of novel antibiotics is essential since the current arsenal of  
55 antimicrobials will soon be ineffective due to the widespread occurrence of antibiotic  
56 resistance. Development of naturally-occurring cationic antimicrobial peptides (CAMPs)  
57 for therapeutics to combat antibiotic resistance has been hampered by high production  
58 costs and protease sensitivity, among other factors. The ceragenins are a family of  
59 synthetic CAMP mimics that kill a broad spectrum of bacterial species but are less  
60 expensive to produce, resistant to proteolytic degradation and have been associated with  
61 low levels of resistance. Determining how ceragenins function may identify new essential  
62 biological pathways of bacteria that are less prone to development of resistance and will  
63 further our understanding of the design principles for maximizing the effects of synthetic  
64 CAMPs.

## 65 **INTRODUCTION**

66 Our current arsenal of antibiotics will soon be ineffective against the simplest bacterial  
67 infections due to the continued spread of antibiotic resistance (AR) (1). AR has been  
68 identified in virtually all bacterial species of clinical relevance, including Gram-positive  
69 and Gram-negative bacteria as well as mycobacteria (2). Despite the threat that AR  
70 represents to global health, there is a lack in the development of antimicrobials with  
71 innovative mechanisms of action (3-5). A better understanding of the fundamental  
72 principles of how antibiotics kill microbes and how AR develops will help break the  
73 futile cycle of antibiotic development and microbial evolution.

74  
75 Antimicrobial peptides are structurally diverse molecules expressed in a wide  
76 array of organisms that directly kill microbes, including bacteria (6, 7). Many  
77 antimicrobial peptides, such as the class of cationic antimicrobial peptides (CAMP),  
78 rapidly kill bacteria by disrupting membranes although other mechanisms of action were  
79 also suggested (7-9). The potential of using CAMPs to treat AR infections has become a  
80 research focus due to their action against a broad spectrum of pathogens, their selectivity  
81 toward microbial membranes and the low appearance of resistance (6, 10). Despite some  
82 progress in this area, significant barriers to CAMP therapeutic development include high  
83 production costs, toxicity, susceptibility to proteolytic degradation and activation of  
84 allergic responses (6, 10).

85

86 Ceragenins are a family of synthetic amphipathic molecules derived from cholic  
87 acid designed to mimic the activity of endogenous CAMPs (11, 12). These molecules are

88 inexpensive to manufacture and are not susceptible to proteolysis, making them an  
89 attractive alternative to peptide-based synthetic CAMPs. Importantly, ceragenins have  
90 antimicrobial activity against a broad spectrum of microbes, which include both Gram-  
91 negative and Gram-positive bacteria (11, 13). High-level resistance to ceragenins is  
92 seemingly difficult to acquire in the lab as attempts to isolate ceragenin-resistance  
93 bacterial mutants failed in the Gram-positive bacterium *Staphylococcus aureus* and  
94 identified only modest and unstable resistance in Gram-negatives (14). Although  
95 ceragenins were designed as CAMP mimics and can depolarize bacterial membranes  
96 (15), the inability to identify bona-fide ceragenin-resistant bacterial mutants represents a  
97 major barrier in understanding their mechanism of action.

98

99         Here we take a comparative approach using a combination of transcriptomic,  
100 proteomic and genetic approaches to compare the bacterial responses to treatment with  
101 ceragenins and two well-studied CAMPs. The results of this study suggests that  
102 ceragenins kill bacteria by disrupting the bacterial envelope through a distinctive mode of  
103 action from naturally-occurring CAMPs. We also show, for the first time, that ceragenins  
104 have activity against mycobacteria despite their distinctive cell wall architecture.

105 **MATERIALS AND METHODS**

106 **Antimicrobial compounds.** CSA13 and CSA131 (16) as well as CSA44 and CSA144  
107 (17) were prepared as described previously and solubilized at 10 mg/mL in sterile  
108 distilled and deionized (DD) water. LL37 (Anaspec, Fremont, California, USA), colistin  
109 (Sigma-Aldrich, St-Louis, MO, USA) and ciprofloxacin (MP Biomedicals, Irvine,  
110 California, USA) were solubilized at 10 mg/mL in sterile DD water. Erythromycin  
111 (Sigma-Aldrich) was solubilized at 10mg/mL in ethanol. Antimicrobial compounds were  
112 aliquoted and stored at -20° C. Freeze-thaw cycles of stock solutions were limited to three  
113 times.

114  
115 **Bacterial strains, growth conditions.** *E. coli* MG1655 (18), *L. monocytogenes* 10403S  
116 (19), *M. marinum* strain M (20), *M. smegmatis* mc<sup>2</sup>155 (21) and *M. tuberculosis* Erdman  
117 (20) were as previously described. *M. avium* mc<sup>2</sup>2500 is a clinical strain isolated from an  
118 acquired immunodeficiency syndrome (AIDS) patient with pulmonary disease and  
119 predominantly formed a smooth/transparent colony morphotype on solid agar (22). *M.*  
120 *avium* mc<sup>2</sup>2500D is an isogenic, laboratory-derived strain with an opaque colony  
121 morphotype. *E. coli* and *L. monocytogenes* were routinely grown on Mueller-Hinton agar  
122 (MHA) (BD, Franklin Lakes, New Jersey, USA) plates or in cation-adjusted Mueller-  
123 Hinton (CAMH) (BD) broth and on Brain-heart infusion agar (BHIA) (Becton  
124 Dickinson) plates or in Brain-heart infusion (BHI) (BD) broth, respectively. *M. avium*  
125 and *M. tuberculosis* were cultured in Middlebrook 7H9 (BD) broth containing 0.5%  
126 glycerol, 10 % Oleic Albumin Dextrose Catalase (OADC) (Sigma-Aldrich) and 0.05%  
127 Tween-80. *M. marium* was cultured in Middlebrook 7H9 broth containing 0.5% glycerol,

128 10 % OADC and 0.2% Tween-80. *M. smegmatis* was grown on Middlebrook 7H10 (BD)  
129 plates or Middlebrook 7H9 plates containing 0.5% glycerol, 0.5% dextrose and 0.2%  
130 Tween-80, unless otherwise stated. All bacterial strains were grown at 37° C, except from  
131 *M. marinum*, which was grown at 30° C. Liquid cultures were incubated with shaking,  
132 unless otherwise stated.

133

134 **Antibiotic susceptibility testing.** Minimal inhibitory concentrations (MICs) of  
135 antimicrobial compounds against *E. coli* and *L. monocytogenes* were determined by a  
136 broth microdilution technique following the recommendations of the Clinical and  
137 Laboratory Standards Institute (CLSI) (23), except that BHI was used to perform assays  
138 on *L. monocytogenes*. Antibiotic quality control experiments were performed using *E.*  
139 *coli* ATCC25922 (ATCC, Manassas, VA, USA). A similar protocol using extended  
140 incubation periods was used to determine MICs against *M. avium* (10 days), *M. marinum*  
141 (5 days), *M. smegmatis* (3 days) and *M. tuberculosis* (14 days). For the determination of  
142 MICs using mycobacterial species, plates were placed in a vented container containing  
143 damp wipes to minimize evaporation.

144

145 **Time-kill experiments.** Time-kill experiments were performed to characterize the effect  
146 of compounds on bacterial growth and survival. Bacteria were inoculated at  $10^5$ - $10^6$   
147 CFU/mL in liquid media in the absence or presence of antibiotics at the following  
148 concentrations: *E. coli*, 0.5 µg/mL colistin, 64 µg/mL LL37, 4 µg/mL CSA13 and 4  
149 µg/mL CSA131; *L. monocytogenes*, 2 µg/mL CSA13, 2 µg/mL CSA131, 2 µg/mL  
150 ciprofloxacin and 0.25 µg/mL erythromycin; *M. smegmatis*, 0.5 µg/mL CSA13 and 0.5

151  $\mu\text{g/mL}$  ciprofloxacin. Bacterial cultures were grown at  $37^\circ\text{C}$  with shaking and the  
152 number of CFU/mL was determined at several time points. Plates without Tween-80  
153 were used for the CFU determination of *M. smegmatis* cultures.

154

155 **Serial passage experiments.** Serial passage of bacteria in presence of sub-inhibitory  
156 concentrations was performed as previously described (14, 24). Experiments were  
157 performed in CAMH or BHI broth for *E. coli* and *L. monocytogenes*, respectively. In few  
158 cases, bacteria growing at the two highest sub-inhibitory concentrations of antimicrobial  
159 had to be combined in order to get an inoculums of  $10^5$ - $10^6$  CFU/mL.

160

161 **Preparation and sampling of bacterial cultures for transcriptomic profiling.** A single  
162 colony of *E. coli* MG1655 was inoculated into CAMH broth and incubate 16-18 h at  $37^\circ$   
163 C with shaking. Cultures were diluted in fresh media to an  $A_{600nm}$  of 0.1, incubated at  $37^\circ$   
164 C with shaking until an  $A_{600nm}$  of 0.8-1.0 (~2h) and antibiotics were added to each  
165 cultures, which were further incubated for 1 h at  $37^\circ\text{C}$  with shaking. Antibiotic were  
166 adjusted to concentrations having similar impact on *E. coli* growth for that particular,  
167 higher bacterial density, culture format (i.e.  $4\ \mu\text{g/mL}$  colistin,  $8\ \mu\text{g/mL}$  CSA13,  $8\ \mu\text{g/mL}$   
168 CSA131 and  $256\ \mu\text{g/mL}$  LL37). Cultures samples were then mixed 1:2 with RNA Protect  
169 Bacteria Reagent (QIAGEN, Germantown, Maryland, USA), vortexed immediately for 5  
170 seconds and incubated for 5 min at room temperature. The bacterial suspensions were  
171 centrifugated for 10 min at  $5,000 \times g$ , supernatants discarded and pellets were stored few  
172 days at  $-80^\circ\text{C}$  before proceeding to RNA extraction.

173



174 **RNA purification and sequencing.** Bacterial pellets were resuspended in 100  $\mu$ L of 10  
175 mM Tris, 1 mM EDTA, pH 8.0 buffer containing 10 mg/mL lysozyme (Sigma-Aldrich).  
176 2.5  $\mu$ L of 20 mg/mL Proteinase K (NEB, Ipswich, Massachusetts, USA) was added and  
177 samples were incubated at room temperature for 10 min, with frequent mixing. Samples  
178 were combined with 0.5  $\mu$ L of 10% SDS and 350  $\mu$ L of Lysis Buffer (Ambion life  
179 technologies, Invitrogen, Carlsbad, California, USA) containing  $\beta$ -mercaptoethanol,  
180 vortexed and the lysate was transferred into a 1.5 mL RNase-free microcentrifuge tube.  
181 Samples were then passed 5 times through an 18-21-gauge needle and centrifuged at  
182 12,000  $\times$  g for 2 minutes at room temperature. Supernatants were transferred to a new 1.5  
183 mL RNase-free microcentrifuge tube before proceeding to the washing and elution steps  
184 described in the PureLink RNA Mini Kit (Ambion life technologies). Samples were  
185 treated with DNase (NEB) for 15 min at 37 $^{\circ}$  C in a volume of 50  $\mu$ L and 5  $\mu$ L of 25 mM  
186 EDTA was added. Samples were further incubated 10 min at 75 $^{\circ}$  C and quickly placed on  
187 ice before being cleaned and re-eluted using the RNA Clean & Concentrator kit (Zymo  
188 Research, Irvine, CA, USA) and stored at -80 $^{\circ}$  C. The quality and the quantity of each  
189 RNA samples was analyzed by the UC Berkeley QB3 facility using a bioanalyzer and the  
190 Qubit technology. RNA samples were sequenced and preliminary analyzed by the UC  
191 Davis Genome Center and the UC Davis Bioinformatics Core.

192

193 **Analysis of RNAseq data.** The differential expression analyses were conducted using the  
194 limma-voom Bioconductor pipeline (25) (EdgeR version 3.20.9, limma version 3.34.9)  
195 and R 3.4.4 by the UC Davis Bioinformatics Core. The multidimensional plot was  
196 created using the EdgeR function plotMDS. Pathway analyses were performed using

197 DAVID Bioinformatics Resources 6.8 (26, 27). Only annotation terms from the following  
198 databases were included: UP (UniProt) Keywords, COG (Cluster of Orthologous Groups)  
199 Ontology, GO (Gene Ontology for Biological process, Molecular function and Cellular  
200 component) and KEGG (Kyoto Encyclopedia of Genes and Genomes). Venn diagram  
201 analyses were performed using the tool provided on the Bioinformatics & Evolutionary  
202 Genomics website of Ghent University (28). Promoter and regulatory binding analyses  
203 were performed using the Gene Expression Analysis Tools (29). Only one repeated  
204 binding sites and promoters was considered for each gene for any specific transcription  
205 factors. Lists of genes to be included in specific regulons were retrieved from the  
206 RegulonDB Database (30). Fold changes for few transcripts of regulons CpxR (*cpxQ*,  
207 *csgC*, *cyaR*, *efeU*, *rprA*, *rseD*), PurR (*codA*, *codB*) and PhoB (*cusC*, *phnE*, *prpR*) were  
208 not included in this analysis. The information related to the expected activity (induction  
209 and/or repression) of each transcription factor on specific genes were also retrieved from  
210 the RegulonDB Database.

211

212 **Protein extraction and peptide preparation from *E. coli* cultures.** A single colony of  
213 *E. coli* MG1655 was inoculated into CAMH broth and incubate 16-18 h at 37° C with  
214 shaking. Cultures were diluted in fresh media to an  $A_{600nm}$  of 0.1, incubated at 37° C with  
215 shaking until an  $A_{600nm}$  of 0.8-1.0 (~2 h) and antibiotics (4 µg/mL colistin or 8 µg/mL  
216 CSA13) were then added to each cultures, which were further incubated for 3 h at 37° C  
217 with shaking. Protein were extracted, digested and desalted, as previously described (31),  
218 with few modifications. Briefly, 23 mL of bacteria cultures were washed twice in cold  
219 PBS and resuspended in 4 mL of lysis buffer (8 M urea, 150 mM NaCl, 100 mM

220 ammonium bicarbonate, pH 8) containing Roche mini-complete protease inhibitor  
221 EDTA-free and Roche PhosSTOP (1 tablet of each per 10 mL of buffer) (Roche, Basel,  
222 Switzerland). Samples (on ice) were then sonicated 10 times with a Sonics VibraCell  
223 probe tip sonicator at 7 watts for 10 seconds. Insoluble precipitates were removed from  
224 lysates using a 30 min centrifugation at  $\sim 16,100 \times g$  at  $4^{\circ}C$  and the protein concentration  
225 of each lysates was determined using the microplate procedure of the Micro BCA<sup>TM</sup>  
226 Protein Assay Kit (Thermo Fischer Scientific, Emeryville, CA, USA). Clarified lysates (1  
227 mg each) was reduced with 4 mM tris(2-carboxyethyl)phosphine for 30 min at room  
228 temperature, alkylated with 10 mM of iodoacetamide for 30 min at room temperature in  
229 the dark and quenched with 10 mM 1,4-dithiothreitol for 30 min at room temperature in  
230 the dark. Samples were diluted with three volumes of 100 mM ammonium bicarbonate,  
231 pH 8.0, and incubated with 10  $\mu g$  of sequencing grade modified trypsin (Promega,  
232 Madison, WI, USA) while rotating at room temperature for 18 hours. Trifluoroacetic acid  
233 (TFA) was then added to a final concentration of 0.3% to each samples, followed by  
234 1:100 of 6M HCl and the removal of insoluble material by centrifugation at  $\sim 2,000 \times g$   
235 for 10 min. SepPak C18 solid-phase extraction cartridges (Waters, Milford, MA, USA)  
236 were activated with 1 mL of 80% acetonitrile (ACN), 0.1% TFA, and equilibrated with 3  
237 mL of 0.1% TFA. Peptides were desalted by applying samples to equilibrated columns,  
238 followed by a washing step with 3 mL of 0.1% TFA and elution with 1.1 mL of 40%  
239 ACN, 0.1% TFA. The subsequent global protein analysis was performed using 10  $\mu g$  of  
240 each desalted peptide sample.

241

242 **Liquid chromatography, mass spectroscopy and label-free quantification.** Peptides  
243 were analyzed using liquid chromatography and mass spectroscopy, as previously  
244 described (31). Mass spectrometry data was assigned to *E. coli* sequences and MS1  
245 intensities were extracted with MaxQuant (version 1.6.0.16) (32). Data were searched  
246 against the *E. coli* (strain K12) protein database (downloaded on November 6, 2018).  
247 MaxQuant settings were left at the default except that trypsin (KR|P) was selected,  
248 allowing for up to two missed cleavages. Data were then further analyzed with the artMS  
249 Bioconductor package (33), using the MSstats Bioconductor package (version 3.14.1)  
250 (34) and the artMS version 0.9. Contaminants and decoy hits were removed, and samples  
251 were normalized across fractions by median-centering the  $\log_2$ -transformed MS1  
252 intensity distributions. The MSstats group comparison function was run with no  
253 interaction terms for missing values, no interference, unequal intensity feature variance as  
254 well as restricted technical and biological scope of replication.  $\log_2$ (fold change) for  
255 protein/sites with missing values in one condition but found in > 2 biological replicates of  
256 the other condition of any given comparison were estimated by imputing intensity values  
257 from the lowest observed MS1-intensity across samples (33), and  $P_{\text{values}}$  were randomly  
258 assigned between 0.05 and 0.01 for illustration purposes.

259

260 **Identification of genetic determinants of resistance to antibiotics using CRISPRi.** A  
261 pooled CRISPRi library of strains with inducible knockdown of genes predicted to be  
262 essential (FIG. S1) was used to study the genetic determinants of resistance to CAMPs  
263 and ceragenins. To quantify the antibiotic sensitivity of each CRISPRi strain, the relative  
264 proportion of each sgRNA spacer in the mixed population was enumerated by deep

265 sequencing, after 15 doublings in presence of saturating IPTG and 0.031  $\mu\text{g}/\text{mL}$  colistin,  
266 12  $\mu\text{g}/\text{mL}$  LL37, 0.5  $\mu\text{g}/\text{mL}$  CSA13 and 0.25  $\mu\text{g}/\text{mL}$  CSA131. Briefly, a single glycerol  
267 stock of the pooled library was fully thawed, inoculated into 10 mL LB at 0.01  $A_{600}$ , and  
268 grown for 2.5 hr (final  $\sim 0.3 A_{600}$ ) at 37° C with shaking. This culture was collected (10  
269 mL, t0) and used to inoculate replicate 4 mL LB cultures (+/- 1mM IPTG and antibiotics)  
270 at 0.01  $A_{600}$ , which were then repeatedly grown 130 min to 0.3  $A_{600}$  (5x doublings) and  
271 back-diluted to 0.01 for a total of 3 times (15x doublings). At the endpoint, cultures were  
272 collected (4 mL, t15) by pelleting ( $9000 \times g$  for 2 min) and stored at -80° C. The  
273 following day, genomic DNA was extracted using the DNeasy Blood & Tissue kit  
274 (Qiagen #69506) with the recommended pre-treatment for Gram-negative bacteria and a  
275 RNase A treatment. sgRNA spacer sequences were amplified from gDNA using Q5  
276 polymerase (NEB) for 14x cycles using custom primers containing TruSeq adapters and  
277 indices, followed by gel-purification from 8% TBE gels. All sequencing was performed  
278 at the Chan Zuckerberg Biohub on the Illumina NextSeq platform using Single End 50bp  
279 reads.

280

281       Design of the sequencing libraries was optimized to enable multiplexing of many  
282 samples and to ensure diversity during cluster generation on the Illumina platform.  
283 Custom primers were used to generate the sequencing library that incorporated a second  
284 barcode (4bp) to be read in Read 1 (SeqLib.A.F and SeqLib.B.F in Fig. S1). In  
285 combination with the TruSeq barcode incorporated by the opposite primer (SeqLib.R in  
286 Fig. S1), this enabled the samples to be effectively dual-indexed. In preparing the  
287 sequencing libraries, samples were split into two types, Library Type A and Library Type

288 B, which differ in the offset position of the TruSeq Read 1 primer used for sequencing  
289 (Fig. S1). Briefly, Library Type A introduces a 2bp offset, as such that, when libraries of  
290 Type A and Type B are sequenced on the same flowcell, diversity of sequencing reads is  
291 ensured throughout the read length, which includes the spacer region (variable sequence)  
292 and the promoter region (identical sequence).

293

294         Spacer sequences were extracted from FASTQ files and counted by exact  
295 matching to expected library spacers. For each treatment condition, the counts tables  
296 from each biological replicate were used as inputs for DESeq2 to calculate the change in  
297 abundance ( $\text{Log}_2\text{FC}$ ) and statistical significance ( $P_{\text{value}}$  and adjusted  $P_{\text{value}}$ ).

298

299 **Determination of LogP values.** LogP values (partition coefficient) were determined  
300 using Chemicalize from ChemAxon (Escondido, California, USA).

301

302 **Preparation of graphs.** GraphPad Prism software (v.7.00) was used to generate graphs  
303 and performed statistical tests. Number of independent experiments are indicated in each  
304 figure legend.

305

306 **RESULTS**

307 **Susceptibility of bacteria to CAMPs and ceragenins.** Minimal inhibitory  
308 concentrations (MIC) for the CAMPs colistin and LL37 as well as two ceragenin  
309 compounds, CSA13 and CSA131 (see structures in FIG. 1A), were determined against  
310 the Gram-negative bacterium *E. coli*, the Gram-positive bacterium *L. monocytogenes* and  
311 several mycobacterial species (i.e. *M. avium*, *M. marinum*, *M. smegmatis* and *M.*  
312 *tuberculosis*) (FIG. 1B-1H and Table S1). The fluoroquinolone antibiotic ciprofloxacin  
313 (CIP, which inhibits DNA gyrase) was included as a positive control. As expected,  
314 colistin, which requires binding to LPS for activity (35), was active against *E. coli* (FIG.  
315 1B), but not against *L. monocytogenes* (FIG. 1C) and each of the mycobacterial species  
316 (FIG. 1D-1H). Interestingly, LL37 was active against *E. coli* (FIG. 1B) and *L.*  
317 *monocytogenes* (FIG. 1C) but had no detectable activity against mycobacterial species  
318 (FIG. 1D-1H). The ceragenins CSA13 and CSA131 were also active against both *E. coli*  
319 (FIG. 1B) and *L. monocytogenes* (FIG. 1C). In contrast to colistin and LL37, the  
320 ceragenins had activity against mycobacteria, although the MICs varied between species  
321 (FIG. 1D-1H). While *M. smegmatis* was highly susceptible to CSA13 and CSA131 (FIG.  
322 1G), both compounds were less active against the slower-growing species *M. avium*  
323 (FIG. 1D and 1E), *M. marinum* (FIG. 1F) and *M. tuberculosis* (FIG. 1H). Similar trends  
324 in MIC values for *E. coli*, *L. monocytogenes* and *M. smegmatis* were observed with two  
325 other ceragenin compounds, CSA44 and CSA144 (See Table S1), which further  
326 confirmed that ceragenins have antimicrobial activity against mycobacteria. Overall,  
327 these results demonstrate that the spectrum of activity of ceragenins is broader than  
328 colistin and LL37, indicating different requirements for activity.

329

330 **Ceragenins are bactericidal.** To determine if ceragenins kill all three types of bacteria,  
331 we performed kill-curve experiments at inhibitory concentrations ( $\sim 1-2 \times$  MICs) of the  
332 molecules (FIG. 1I-1K). Ceragenins (CSA13 or CSA131) killed  
333 *E. coli* (FIG. 1I), *L. monocytogenes* (FIG. 1J) and *M. smegmatis* (FIG. 1K), although  
334 some bacterial cultures recovered during this time course. These results confirmed that  
335 ceragenins act on bacteria through a bactericidal mechanism.

336

337 **Serial passage of *E. coli* and *L. monocytogenes* in the presence of sub-inhibitory**  
338 **concentrations of ceragenins.** Isolation and characterization of antibiotic-resistant  
339 bacteria could provide insight into the mode of action of ceragenins. As such, the  
340 generation of ceragenin-resistant bacteria was attempted by performing serial passaging  
341 experiments with *E. coli* and *L. monocytogenes* in the presence of sub-inhibitory  
342 concentrations of ciprofloxacin, CSA13 and CSA131 (FIG. 1L and 1M). In contrast to  
343 ciprofloxacin-exposed bacteria, *E. coli* and *L. monocytogenes* bacteria exposed to  
344 ceragenins did not give rise to stable resistance. The generation of spontaneous *M.*  
345 *smegmatis* mutants resistant to CSA13 was also attempted, but no CSA13-resistant  
346 bacteria were recovered, although bacteria resistant to ciprofloxacin and rifampicin were  
347 isolated from parallel control experiments (data not shown). These results confirmed that  
348 resistance to ceragenins is infrequent (14) and does not emerge *in vitro* under conditions  
349 known to generate resistant mutants against antibiotics.

350



351 **Transcriptional response of *E. coli* exposed to ceragenins.** The transcriptional  
352 response of bacteria to antibiotics was analyzed to gain insights into the mechanism of  
353 action of CAMPs and ceragenins, as similarly reported for other antibacterial compounds  
354 (36, 37). More specifically, we determined the global transcriptional responses of *E. coli*  
355 exposed to colistin, LL37, CSA13 and CSA131 using RNAseq. Bacteria were grown to  
356 log phase and treated with supra-MIC concentrations of antibiotics for one hour before  
357 being harvested for RNA extraction and sequencing (see Materials and Methods). Plots  
358 of the normalized number of reads per gene showed an excellent correlation ( $R = 0.965-$   
359  $0.999$ ) between biological replicates for each of the conditions tested (FIG. 2A-2D),  
360 demonstrating the reproducibility of the method. Hundreds of statistically significant  
361 changes in gene expression (defined by absolute  $\log_2$  fold change  $>1$  and adjusted  $P_{\text{value}} <$   
362  $0.05$ ) following exposure of bacteria to colistin, LL37, CSA13 and CSA131 were  
363 measured (FIG. 2E-2H and Data Set S1). These results validated our RNAseq approach  
364 for the analysis of the transcriptional response of *E. coli* to antibiotics.

365

366       The global transcriptional responses of *E. coli* in response to CAMPs and  
367 ceragenins was analyzed using a multidimensional scaling analysis (FIG. 2I).  
368 Interestingly, while transcriptional responses of bacteria to CAMPs were extremely  
369 similar, the response to CSA13 and CSA131 were not only distinct from these CAMPs,  
370 but also distinct from each other. Those trends were corroborated using pathway analysis  
371 that showed the enrichment of annotation terms associated with the outer membrane (e.g.  
372 lipopolysaccharide and colanic acid) in genes up-regulated by CAMPs, but not  
373 ceragenins, (FIG. 2J and Data Set S2) as well as the enrichment of terms associated with

374 translation in genes down-regulated by CSA13, but not CSA131 (FIG. 2K and Data Set  
375 S2). While the two ceragenins are structurally quite similar, the addition of four  
376 methylene groups to the CSA13 carbon chain to create CSA131 significantly increases  
377 the hydrophobicity of the molecule, increasing the partition coefficient from  $\text{LogP}_{\text{CSA13}} =$   
378  $5.51$  to  $\text{LogP}_{\text{CSA131}} = 7.29$  (see Materials and Methods), which likely contributes to  
379 differences in antibacterial activities. Overall, these results showed that transcriptional  
380 responses of *E. coli* to the naturally-occurring CAMPs colistin and LL37 are similar, but  
381 differ from the response to ceragenins. These results also suggested that *E. coli* responds  
382 differently to the structurally related ceragenin compounds, CSA13 and CSA131.

383

384 **Identification of pathways defining the transcriptional response of *E. coli* to**  
385 **ceragenins.** Pathway analysis of genes modulated by more than one compound was  
386 performed to further define transcriptional responses to CAMPs and ceragenins. The  
387 Venn diagram in Figure 3A visualizes the extent of overlap of the individual *E. coli* genes  
388 that had significant increases in mRNA abundance upon treatment with each of the  
389 molecules. In particular, 86 genes were induced in all four conditions, 68 were  
390 upregulated specifically during CAMP treatment while 57 were induced by the  
391 ceragenins (FIG. 3A and Data Set S3). The annotation term “signal” was significantly  
392 enriched among the genes up-regulated by all antibiotics (FIG. 3A and Data Set S3),  
393 which might be indicative of a common response to CAMPs and ceragenins.

394 Interestingly, this group included genes involved in the membrane stress response such as  
395 *spy*, *degP* and *cpxP* (38) (Fig. 3B). Consistent with results from FIG. 2, genes specifically  
396 up-regulated in bacteria exposed to CAMPs were significantly associated with annotation

397 terms related to LPS/colanic acid biosynthesis and included genes such as *wzc*, *wcaE* and  
398 *cpsB* (FIG. 3A, 3B and Data Set S3). Interestingly, genes specifically up-regulated in  
399 bacteria exposed to ceragenins were significantly associated with the annotation term  
400 “phosphate transport” (FIG. 2J, FIG. 3A and Data Set S3) and include genes encoding the  
401 major phosphate-responsive regulators PhoR and PhoB (FIG. 3B). Overall, these results  
402 suggested that *E. coli* responds to CAMPs and ceragenins by upregulating genes involved  
403 in signaling and response to membrane stress. These results also showed that while  
404 exposure of *E. coli* to CAMPs induces the expression of genes related to LPS/colanic  
405 acid biosynthesis, exposure to ceragenins induces the expression of genes involved in  
406 phosphate transport.

407

408 For genes with mRNA levels that decreased during these treatments, 101 were  
409 down-regulated by all antibiotics, 19 by CAMPs, and 70 by ceragenins (FIG. 3C and  
410 Data Set S3). Pathway analysis identified enrichment of terms related to amino acids and  
411 nucleotide metabolism in genes down-regulated following exposure to all antibiotics  
412 (FIG. 3C and Data Set S3). This finding was corroborated by the finding that genes  
413 related to purine and pyrimidine biosynthesis (e.g. *pyrB*, *purM* and *purT*) were among the  
414 most significantly down-regulated genes by these molecules (FIG. 3D), which is  
415 consistent with our pathway analysis (FIG. 2K). Whereas no annotation terms were  
416 significantly enriched for genes only down-regulated by CAMPs, genes down-regulated  
417 by ceragenins showed an enrichment for genes involved in oligopeptide/dipeptide  
418 transport such as *dppD* and *dppA* (FIG. 3C, FIG 3D and Data Set S3). Although the  
419 reason for the downregulation of genes involved in peptide transport in *E. coli* exposed to

420 ceragenins is unknown, these results suggested that bacteria exposed to CAMPs and  
421 ceragenins respond by downregulating genes involved in metabolic pathways.  
422

423 **Identification of cis-acting elements that regulate the transcriptional response of *E.***  
424 ***coli* to ceragenins.** To determine which signal transduction pathways control the  
425 transcriptional responses to CAMPs and ceragenins, the DNA sequences immediately 5'  
426 of genes with significantly altered mRNA levels were analyzed for the presence of cis-  
427 acting promoter and operator sequences known or predicted to recruit transcription  
428 factors (29). Interestingly, genes up-regulated following exposure to each of the  
429 molecules (FIG. 4A and Data Set S4) were associated with cis-acting elements  
430 interacting with the response regulator CpxR of the CpxA/CpxR two-component  
431 regulatory system (enrichment of 11.63%; 10 out of 86 genes), which responds to  
432 envelope stress (39) and is consistent with the upregulation of the CpxR-regulon genes  
433 *spy*, *degP* and *cpxP* (FIG. 3B). This analysis also showed enrichment for genes associated  
434 with cis-acting elements binding the primary sigma factor  $\sigma^D$  (40), also involved in the  
435 redistribution of the RNA polymerase in response to osmotic stress (41), the alternative  
436 sigma factor  $\sigma^E$  that coordinates the envelope stress response (39, 42, 43), and the  
437 alternative sigma factor  $\sigma^H$ , which controls the expression of heat shock genes as well as  
438 genes involved in membrane functionality and homeostasis (44) (FIG. 4A). Genes down-  
439 regulated following exposure to all antibiotics were associated with the presence of  
440 binding sites for the HTH-type transcriptional repressor PurR (FIG. 4B and Data Set S4),  
441 which regulates genes involved in the de novo synthesis of purine and pyrimidine  
442 nucleotides (45, 46) and corroborates our above analysis (FIG. 2K, 3C and 3D). Overall,

443 these results suggested that CAMPs and ceragenins perturb the bacterial envelope and  
444 trigger the CpxA/CpxR system. These results also suggested that PurR down-regulates  
445 the expression of genes involved in the biosynthesis of purine and pyrimidine following  
446 the exposure of *E. coli* to CAMPs and ceragenins.

447

448 **Expression of the CpxR, PurR, RcsA and PhoB regulons in *E. coli* exposed to**  
449 **ceragenins.** To further confirm a role for CpxR and PurR in the response of *E. coli* to  
450 CAMPs and ceragenins, the expression of the CpxR and PurR regulons was analyzed in  
451 more detail (FIG. 5A-B and Data Set S4). The heat map of the CpxR regulon showed a  
452 consistent regulation of several genes in bacteria exposed to all four compounds (e.g.  
453 *cpxP*, *degP*, *dsbA* and *spy*) (FIG. 5A) and corroborates our results described above (FIG.  
454 3B and 4A). Also consistent with our findings described above (FIG. 2K, 3C, 3D and  
455 4B), the heat map of the PurR regulon (FIG. 5B) showed downregulation of most genes  
456 reported to be repressed by this transcription factor. These results confirmed that the  
457 expression of the CpxR and PurR regulons are modulated in *E. coli* exposed to CAMPs  
458 and ceragenins.

459

460 Our expression analysis led us to also focus on the RcsA and PhoB regulons to  
461 gain insight into the differential regulation of genes involved in the biosynthesis of  
462 colonic acid and phosphate transport, respectively (FIG. 5C-D and Data Set S4). RcsA  
463 regulates the expression of genes involved in colonic acid biosynthesis (39), a pathway  
464 that was up-regulated in *E. coli* exposed to CAMPs, but not ceragenins (FIG. 2J, 3A and  
465 3B). Accordingly, the heat map of the RcsA regulon showed a marked modulation of this

466 pathway in *E. coli* exposed to CAMPs in comparison to ceragenins (FIG. 5C). The  
467 phosphate regulon transcriptional regulatory protein PhoB regulates the expression of  
468 genes involved in phosphate transport (47) and is up-regulated in *E. coli* following  
469 exposure to ceragenins, but not CAMPs (FIG. 2J, 3A and 3B). Accordingly, the heat map  
470 of the PhoB regulon showed partial but specific induction in bacteria exposed to  
471 ceragenins (FIG. 5D). More specifically, upregulation of the *phn C-phnP* operon, the  
472 *pstSCAB-phoU* operon as well as a trend for other *pho* genes (e.g. *phoB* and *phoR*) and  
473 the phosphate starvation-inducible *psiEF* genes were specifically observed in bacteria  
474 exposed to ceragenins (FIG. 5D). These results suggested that the specific upregulation of  
475 genes involved in colanic acid biosynthesis and phosphate transport in bacteria exposed  
476 to colistin/LL37 and ceragenins are mediated by RcsA and PhoB, respectively.

477

478 **Proteomic response of *E. coli* exposed to colistin and CSA13.** To determine if the  
479 changes in mRNA levels in response to the molecules led to changes in the proteome, we  
480 measured global protein abundance in bacteria exposed to colistin and CSA13 by mass  
481 spectrometry-based proteomics. *E. coli* cultures were grown to log phase and treated with  
482 supra-MIC concentrations of antibiotics before protein extraction, peptide preparation  
483 and peptide quantification (see Materials and Methods). Approximately 1800 unique  
484 proteins were detected for each biological replicate (FIG. 6A) and the number of unique  
485 peptides identified showed an excellent correlation between biological replicates (FIG.  
486 6B). Several statistically significant changes in protein expression (absolute  $\log_2$  fold  
487 change  $>1$  and adjusted  $P_{\text{value}} < 0.05$ ) were observed following exposure of *E. coli* to  
488 colistin (FIG. 6C) and CSA13 (FIG. 6D) (see Data Set S5). The dataset showed that *E.*

489 *coli* exposed to both colistin and CSA13 up-regulated the proteins DegP, Spy and YepE,  
490 which are known members of the Cpx regulon (38) that were strongly up-regulated at the  
491 transcriptional level following exposure to CAMPs and ceragenins (FIG. 5A). The  
492 dataset also showed the modulation of proteins involved in colanic acid biosynthesis (e.g.  
493 Ugd and WcaG) or related to the PhoB regulon (e.g. PstB and PstS) in bacteria exposed  
494 to colistin or CSA13, respectively, which also corroborate our transcriptional data (FIG.  
495 5C and 5D). Then, similarly to our transcriptional analysis, the proteomic data showed a  
496 common induction of the Cpx envelope stress response, but also the specific induction of  
497 proteins involved in colanic acid biosynthesis by colistin as well as the modulation of  
498 members of the PhoB regulon by CSA13.

499

500         Annotation term enrichment analysis was performed on the proteomic dataset in  
501 order to identify pathways significantly modulated in bacteria exposed to colistin and  
502 CSA13 (see Data Set S6). Similar to our transcriptional results (FIG. 2J), the colanic acid  
503 pathway was significantly enriched among proteins up-regulated by colistin, but not  
504 CSA13 (FIG. 6E). A heat response signature was significantly enriched among proteins  
505 upregulated by CSA13, but not colistin (FIG. 6E), corroborating the transcriptional  
506 upregulation of genes associated with cis-acting elements for  $\sigma^H$  (FIG. 4A). In addition,  
507 while pathways associated with the periplasm were enriched among proteins down-  
508 regulated by both colistin and CSA13, the outer membrane pathway was significantly  
509 enriched among proteins down-regulated by colistin, but not by CSA13 (FIG. 6E).  
510 Overall, these results confirmed that *E. coli* responds distinctly to colistin and CSA13,  
511 although both compounds modulated proteins associated with the bacterial envelope.

512 These results also confirmed findings from the transcriptional analysis and showed that  
513 colistin and CSA13 modulate the colanic acid and the response to heat pathways,  
514 respectively.

515

516 **Identification of genetic determinants of resistance to ceragenins in *E. coli*.** Our  
517 inability to identify ceragenin-resistant *E. coli* mutants (FIG. 1L and 1M) is consistent  
518 with results previously published by Pollard *et al.* (14), indicating that resistance to  
519 ceragenins emerges infrequently in culture despite strong selective pressure. This  
520 suggests that ceragenins either have multiple essential targets or affect cellular structures  
521 that are immutable. Thus, traditional genetic approaches to identify the target(s) of  
522 ceragenins has not been feasible. In order to gain insight into the genetic determinants of  
523 ceragenin action, we employed an alternative genetic approach that utilizes Clustered  
524 Regularly Interspaced Short Palindromic Repeats interference (CRISPRi) to reduce  
525 expression of genes in *E. coli* (FIG. 7A). As demonstrated previously, this approach  
526 allows for partial knockdown of essential *E. coli* genes, practically creating hypomorphic  
527 alleles that have reduced function but still promote cell viability (48, 49). By combining  
528 these genetic perturbations with subinhibitory concentrations of antibiotics and by  
529 measuring the effects on bacterial fitness, we sought to identify functional interactions  
530 between bacterial pathways and antibiotic stress.

531

532 We screened a pooled library of inducible essential gene knockdown strains  
533 grown with or without subinhibitory concentrations of CAMPs or ceragenins (FIG. 7B).  
534 To evaluate the fitness of each individual CRISPRi knockdown within the complex



535 population, we used deep sequencing to measure the relative abundance of guide  
536 sequences during the different culturing conditions (see Materials and Methods and  
537 FIG.S1). Fold changes in abundance ( $\text{Log}_2\text{FC}$ ) in response to CAMPs and ceragenins  
538 were calculated in comparison to the control condition for each knockdown strain, and  
539 significantly resistant or sensitized strains (defined by absolute  $\log_2$  fold change  $> 0.5$  and  
540 an adjusted  $P_{\text{value}} < 0.05$ ) were identified for each of the compounds (FIG. 7C-7F and  
541 Data Set S7). Interestingly, the CRISPRi guides in the sensitized or enriched strains for  
542 one or several treatments predominantly targeted genes involved in the bacterial  
543 envelope, consistent with our earlier results that both CAMPs and ceragenins affect the  
544 bacterial envelope.

545

546         The changes in abundance for the genes identified above were further analyzed  
547 and compared between treatments (FIG. 7G). Genes involved in the LPS biosynthetic  
548 pathways were predominant in these screens, and knockdown of lipid-A-disaccharide  
549 synthase LpxB (50) sensitized *E. coli* to all the compounds, highlighting again the  
550 bacterial surface as a common site of action for CAMPs and ceragenins. Silencing of the  
551 LPS transport genes *lptB* and *lptF* (51) led to sensitivity to colistin, LL37 and CSA131,  
552 but not to CSA13, which corroborates the above transcriptomic data (FIG. 2I-K) and  
553 again suggests distinctive mechanisms of action for CSA13 and CSA131. Furthermore,  
554 knockdown of *kdsC* (56), encoding an enzyme involved in LPS biosynthesis, also led to  
555 sensitivity to LL37. Knockdown strains for *rpoE*, the gene encoding the envelope stress  
556 responsive sigma factor  $\sigma^E$  (39, 42, 43), and the ubiquinone biosynthesis gene *ubiJ* (58)  
557 were sensitive to CSA13, but not to CSA131, also supporting the idea that these

558 ceragenins have distinctive mechanisms of action. On the other hand, the knockdown  
559 strain for the fatty acid biosynthesis gene *fabI* (52, 53) was sensitive to both CSA13 and  
560 CSA131 and not to the CAMPs, and may constitute a common molecular determinant of  
561 sensitivity to ceragenins. Other genes involved in fatty acid metabolism were identified  
562 as genetic interactors with CAMPs. More specifically, interference with the expression of  
563 *acpP*, encoding acyl carrier protein (54), led to resistance to colistin, whereas knockdown  
564 of *fabZ*, encoding a lipid dehydratase (55), led to sensitivity to LL37, demonstrating  
565 differences between the mechanisms of action of these two CAMPs, as previously  
566 suggested (35, 57). Taken together, these results support the notion that both CAMPs and  
567 ceragenins work by similar yet distinct mechanisms. These studies also provide a starting  
568 point for genetic determination of the mode of action for ceragenins.

569

570 **DISCUSSION**

571 Although ceragenins were originally designed to mimic the physiochemical properties of  
572 CAMPs (11, 12), our results indicate that they evoke different responses from bacteria  
573 than naturally-occurring CAMPs. The fact that they work on a broader array of microbes  
574 than CAMPs, including mycobacteria, as showed by this study, also suggests that they  
575 have different mechanisms of action. Our results showed that ceragenins target an  
576 essential and conserved feature of the cellular envelope and kill phylogenetically diverse  
577 bacteria. Using transcriptomics, proteomics and a CRISPRi genetic approach, we  
578 compared the responses of bacteria to CAMPs and ceragenins and revealed similarities,  
579 but also striking differences, and showed that ceragenins trigger a distinctive envelope  
580 stress response. Interestingly, our data also suggested that the two prototypical  
581 ceragenins, CSA13 and CSA131, trigger different responses in bacteria. Overall, while  
582 our results confirmed that ceragenins act on the bacterial envelope, they challenged the  
583 assumption that CAMPs and ceragenins share the same mechanism of action.

584

585         Although ceragenins have the ability to kill mycobacteria, their activity varies  
586 considerably among species. The physicochemical properties of the mycobacterial cell  
587 envelope influences its permeability (59) and might explain the observed differences in  
588 susceptibility to ceragenins among mycobacterial strains and species (FIG. 1). The  
589 identification of the target(s) of ceragenins may reveal an essential feature of the  
590 clinically-relevant mycobacteria.

591

592           The profiling of the response of *E. coli* to CAMPs and ceragenins showed that  
593 these compounds trigger the Cpx envelope stress response, which is known to contribute  
594 to the bacterial adaptation to defects in the secretion and folding of inner membrane and  
595 periplasmic proteins (39, 60). This corroborates previous studies demonstrating that  
596 CpxR/CpxA influence the susceptibility of bacteria to CAMPs (61, 62) and suggests that  
597 the Cpx response might similarly help bacteria to survive exposure to ceragenins. The  
598 hypothesis that the envelope stress response is induced by CAMPs and ceragenins is also  
599 supported by the modulation of genes associated with cis-acting elements for  $\sigma^E$  (FIG. 4)  
600 and by the enrichment and/or depletion of CRISPRi strains targeting components of the  
601 bacterial envelope (FIG. 7).

602

603           A striking similarity between the transcriptomic profiles of bacteria exposed to  
604 CAMPs and ceragenins is the downregulation of genes involved in the biosynthesis of  
605 purines and pyrimidines (FIG. 2K, 3C, 3D, 4B & 5B). The cause of this downregulation  
606 is unknown, but it is possible that the repression of these metabolic pathways is part of  
607 the adaptive response to antibiotic exposure (63) and/or relates to a decrease requirement  
608 for nucleic acid in growth-inhibited bacteria. An intriguing question is whether the flux of  
609 the metabolites through these nucleotide metabolic pathways affect susceptibility to  
610 antimicrobial agents targeting the bacterial envelope, as observed for other antibiotics  
611 (64).

612

613           The results of this study showed that *E. coli* responds differently to CAMPs and  
614 ceragenins. We showed that CAMPs specifically induced the Rcs response and the

615 expression of genes involved in the biosynthesis of colanic acid (FIG. 2J, 3A, 3B, 5C, 6C  
616 and 6E). This is consistent with a previous study that demonstrated that CAMPs,  
617 including polymyxin B and LL37, induce the Rcs regulon through the outer membrane  
618 lipoprotein RcsF (65). Surprisingly, the ceragenins CSA13 and CSA131 did not induce  
619 the Rcs response as markedly as CAMPs (FIG. 5C). In contrast with the current model  
620 that outer membrane perturbation by CAMPs is required for the activation of the Rcs  
621 response by RcsF (65, 66), our results show that ceragenins perturb the bacterial envelope  
622 of *E. coli* without extensively triggering the Rcs response. We also found that ceragenins,  
623 but not CAMPs, induced the expression of genes involved in phosphate transport and of  
624 the PhoB regulon (FIG. 2J, 3A, 3B, 5D and 6D). Although the reasons why these genes  
625 are differently modulated following exposure to antimicrobial compounds is not  
626 understood, these results strongly suggest that ceragenins and CAMPs might have  
627 distinctive mechanisms of action.

628

629         Despite some similarities between the response of bacteria exposed to ceragenins,  
630 such as the upregulation of several genes of the Cpx and PhoB regulons and the  
631 downregulation of genes involved in nucleotides metabolism, our data also showed  
632 striking differences between bacteria exposed to CSA13 and CSA131 (FIG. 2I, 2J, 2K  
633 and 7G). These differences include the upregulation of genes encompassing several  
634 functions (e.g. transcription factors and proteins involved in the heat response) as well as  
635 the downregulation of genes involved in protein translation in bacteria exposed to CSA13  
636 (FIG. 2J and 2K). The cause of these differences is unknown, however, as noted above,  
637 the LogP values of CSA13 and CSA131 differ by almost 2 orders of magnitude. Given

638 that the site of action is the bacterial envelope, such significant difference in coefficient  
639 partition values is likely to alter responses to membrane targets. Future work exploring  
640 the response of bacteria to a broader range of ceragenins will help in understanding these  
641 differences and might help in the design of compounds with a more defined mode of  
642 action.

643

644 Our CRISPRi approach identified sensitizing interactions between genes involved  
645 in the biology of the bacterial envelope and the antibacterial compounds colistin, LL37,  
646 CSA13 and CSA131 (FIG.7). This information might prove valuable for the design of  
647 combination therapies that are synergistic and prevent the emergence of resistance, but  
648 also allow treatment regimens with lower concentrations of antibiotics and dose-related  
649 antibiotic toxicity (67-69). As an example, trilosan, a compound inhibiting the ceragenin-  
650 sensitivity determinant FabI (70) (FIG. 7G), might synergize with ceragenins. In addition,  
651 the CAMPs/ceragenins-sensitivity determinant LpxB was suggested as a target for the  
652 development of antibacterial compounds (71), which compounds would have the  
653 potential to more broadly synergize with CAMPs and ceragenins (FIG. 7G). Although  
654 those antibacterial interactions are purely speculative, our results suggest that the  
655 CRISPRi approach presented here constitutes a platform for target identification and the  
656 development of antibiotic combination therapies.

657

658 The results of this study suggested that CAMPs and ceragenins both kill bacteria  
659 by targeting the bacterial envelope. However, this study also supports the hypothesis that  
660 ceragenins have a distinctive mode of action and we propose a model in which ceragenins

661 cross the outer layers of the bacterial envelope and disrupt the inner membrane. This  
662 hypothesis is supported by the broad spectrum of action of these molecules, which extend  
663 beyond bacteria. Whether the broader activity range of ceragenins impacts the selectivity  
664 for microbial membranes characteristic of endogenous CAMPs remains a key question  
665 for future study. A better understanding of the structure-activity relationship of these  
666 compounds and a deeper knowledge of their unique mechanism of action will be essential  
667 in the discovery of the next-generation of ceragenins with increased potency and  
668 selectivity.

669

670 **ACKNOWLEDGEMENTS**

671 The authors would like to thank Teresa Repasy and Guillaume Golovkine for their  
672 assistance during the design of the RNAseq experiments, and Daniel A. Portnoy for  
673 providing *L. monocytogenes* 10403S. We acknowledge help from the UC Berkeley  
674 Functional Genomics Laboratory, the UC Davis Genome Center and the UC Davis  
675 Bioinformatics Core in performing and analyzing RNAseq experiments as well as the  
676 Chan Zuckerberg Biohub for the sequencing of the CRISPRi libraries. The UC Berkeley  
677 proteomics core provided assistance with the LC-MS analysis of our peptide samples.  
678 J.M.B was supported by NIH training grants (4T32HL007185-39 & -40;  
679 5K12HL119997-05; 1K08AI146267-0) and a Cystic Fibrosis Foundation Harry  
680 Shwachman Award during the course of this study. This work was supported by the  
681 Ceragenin Research Fund granted to M.A.M. and J.S.C. by Bill Brown and Sharon  
682 Bonner-Brown.



683 **REFERENCES**

- 684 1. World Health Organization. 2014. Antimicrobial resistance: global report on surveillance  
685 2014. World Health Organization, Geneva, Switzerland.
- 686 2. World Health Organization. 2019. Global tuberculosis report 2019. World Health  
687 Organization, Geneva, Switzerland.
- 688 3. Coates AR, Halls G, Hu Y. 2011. Novel classes of antibiotics or more of the same? *Br J*  
689 *Pharmacol* 163:184-94.
- 690 4. Silver LL. 2011. Challenges of antibacterial discovery. *Clin Microbiol Rev* 24:71-109.
- 691 5. Tommasi R, Brown DG, Walkup GK, Manchester JI, Miller AA. 2015. ESKAPEing the  
692 labyrinth of antibacterial discovery. *Nat Rev Drug Discov* 14:529-42.
- 693 6. Bradshaw J. 2003. Cationic antimicrobial peptides : issues for potential clinical use.  
694 *BioDrugs* 17:233-40.
- 695 7. Brogden KA. 2005. Antimicrobial peptides: pore formers or metabolic inhibitors in  
696 bacteria? *Nat Rev Microbiol* 3:238-50.
- 697 8. Sochacki KA, Barns KJ, Bucki R, Weisshaar JC. 2011. Real-time attack on single  
698 *Escherichia coli* cells by the human antimicrobial peptide LL-37. *Proc Natl Acad Sci U S A*  
699 108:E77-81.
- 700 9. Omardien S, Brul S, Zaat SA. 2016. Antimicrobial Activity of Cationic Antimicrobial  
701 Peptides against Gram-Positives: Current Progress Made in Understanding the Mode of  
702 Action and the Response of Bacteria. *Front Cell Dev Biol* 4:111.
- 703 10. Pfalzgraff A, Brandenburg K, Weindl G. 2018. Antimicrobial Peptides and Their  
704 Therapeutic Potential for Bacterial Skin Infections and Wounds. *Front Pharmacol* 9:281.
- 705 11. Hashemi MM, Holden BS, Durnas B, Bucki R, Savage PB. 2017. Ceragenins as mimics of  
706 endogenous antimicrobial peptides. *J Antimicrob Agents* 3.
- 707 12. Li C, Peters AS, Meredith EL, Allman GW, Savage PB. 1998. Design and Synthesis of  
708 Potent Sensitizers of Gram-Negative Bacteria Based on a Cholic Acid Scaffolding. *J Am*  
709 *Chem Soc* 120:2961-2962.
- 710 13. Piktel E, Levental I, Durnas B, Janmey PA, Bucki R. 2018. Plasma Gelsolin: Indicator of  
711 Inflammation and Its Potential as a Diagnostic Tool and Therapeutic Target. *Int J Mol Sci*  
712 19.
- 713 14. Pollard JE, Snarr J, Chaudhary V, Jennings JD, Shaw H, Christiansen B, Wright J, Jia W,  
714 Bishop RE, Savage PB. 2012. In vitro evaluation of the potential for resistance  
715 development to ceragenin CSA-13. *J Antimicrob Chemother* 67:2665-72.
- 716 15. Epan RF, Pollard JE, Wright JO, Savage PB, Epan RM. 2010. Depolarization, bacterial  
717 membrane composition, and the antimicrobial action of ceragenins. *Antimicrob Agents*  
718 *Chemother* 54:3708-13.
- 719 16. Li C, Budge LP, Driscoll CD, Willardson BM, Allman GW, Savage PB. 1999. Incremental  
720 conversion of outer-membrane permeabilizers into potent antibiotics for Gram-negative  
721 bacteria. *J Am Chem Soc* 121:931-940.
- 722 17. Guan Q, Li C, Schmidt EJ, Boswell JS, Walsh JP, Allman GW, Savage PB. 2000. Preparation  
723 and characterization of cholic acid-derived antimicrobial agents with controlled  
724 stabilities. *Org Lett* 2:2837-40.
- 725 18. Lim B, Miyazaki R, Neher S, Siegele DA, Ito K, Walter P, Akiyama Y, Yura T, Gross CA.  
726 2013. Heat shock transcription factor sigma32 co-opts the signal recognition particle to  
727 regulate protein homeostasis in *E. coli*. *PLoS Biol* 11:e1001735.

- 728 19. Becavin C, Bouchier C, Lechat P, Archambaud C, Creno S, Gouin E, Wu Z, Kuhbacher A,  
729 Brisse S, Pucciarelli MG, Garcia-del Portillo F, Hain T, Portnoy DA, Chakraborty T, Lecuit  
730 M, Pizarro-Cerda J, Moszer I, Bierne H, Cossart P. 2014. Comparison of widely used  
731 *Listeria monocytogenes* strains EGD, 10403S, and EGD-e highlights genomic variations  
732 underlying differences in pathogenicity. *mBio* 5:e00969-14.
- 733 20. Champion PA, Champion MM, Manzanillo P, Cox JS. 2009. ESX-1 secreted virulence  
734 factors are recognized by multiple cytosolic AAA ATPases in pathogenic mycobacteria.  
735 *Mol Microbiol* 73:950-62.
- 736 21. Snapper SB, Melton RE, Mustafa S, Kieser T, Jacobs WR, Jr. 1990. Isolation and  
737 characterization of efficient plasmid transformation mutants of *Mycobacterium*  
738 *smegmatis*. *Mol Microbiol* 4:1911-9.
- 739 22. Otero J, Jacobs WR, Jr., Glickman MS. 2003. Efficient allelic exchange and transposon  
740 mutagenesis in *Mycobacterium avium* by specialized transduction. *Appl Environ*  
741 *Microbiol* 69:5039-44.
- 742 23. Clinical and Laboratory Standards Institute. 2018. Methods for dilution antimicrobial  
743 susceptibility tests for bacteria that grow aerobically. Approved standard. 11th edition.  
744 Clinical and Laboratory Standards Institute, Wayne, PA.
- 745 24. Lamontagne Boulet M, Isabelle C, Guay I, Brouillette E, Langlois JP, Jacques PE, Rodrigue  
746 S, Brzezinski R, Beaugard PB, Bouarab K, Boyapelly K, Boudreault PL, Marsault E,  
747 Malouin F. 2018. Tomatidine Is a Lead Antibiotic Molecule That Targets *Staphylococcus*  
748 *aureus* ATP Synthase Subunit C. *Antimicrob Agents Chemother* 62.
- 749 25. Ritchie ME, Phipson B, Wu D, Hu Y, Law CW, Shi W, Smyth GK. 2015. limma powers  
750 differential expression analyses for RNA-sequencing and microarray studies. *Nucleic*  
751 *Acids Res* 43:e47.
- 752 26. Huang da W, Sherman BT, Lempicki RA. 2009. Bioinformatics enrichment tools: paths  
753 toward the comprehensive functional analysis of large gene lists. *Nucleic Acids Res* 37:1-  
754 13.
- 755 27. Huang DW, Sherman BT, Lempicki RA. 2009. Systematic and integrative analysis of large  
756 gene lists using DAVID Bioinformatics Resources. *Nature Protoc* 4:44-57.
- 757 28. Bioinformatics and Evolutionary Genomics. Calculate and draw custom Venn diagrams.  
758 <http://bioinformatics.psb.ugent.be/webtools/Venn/>. Accessed 2020-02-01.
- 759 29. Huerta AM, Glasner JD, Gutiérrez-Ríos RM, Blattner FR, Collado-Vides J. 2002. GETools:  
760 gene expression tool for analysis of transcriptome experiments in *E. coli*. *Trends in*  
761 *Genetics* 18:217-218.
- 762 30. Santos-Zavaleta A, Salgado H, Gama-Castro S, Sanchez-Perez M, Gomez-Romero L,  
763 Ledezma-Tejeida D, Garcia-Sotelo JS, Alquicira-Hernandez K, Muniz-Rascado LJ, Pena-  
764 Loredó P, Ishida-Gutierrez C, Velazquez-Ramirez DA, Del Moral-Chavez V, Bonavides-  
765 Martinez C, Mendez-Cruz CF, Galagan J, Collado-Vides J. 2019. RegulonDB v 10.5:  
766 tackling challenges to unify classic and high throughput knowledge of gene regulation in  
767 *E. coli* K-12. *Nucleic Acids Res* 47:D212-D220.
- 768 31. Budzik JM, Swaney DL, Jimenez-Morales D, Johnson JR, Garelis NE, Repasy T, Roberts  
769 AW, Popov LM, Parry TJ, Pratt D, Ideker T, Krogan NJ, Cox JS. 2020. Dynamic post-  
770 translational modification profiling of *M. tuberculosis*-infected primary macrophages.  
771 *Elife* 9.
- 772 32. Cox J, Mann M. 2008. MaxQuant enables high peptide identification rates, individualized  
773 p.p.b.-range mass accuracies and proteome-wide protein quantification. *Nat Biotechnol*  
774 26:1367-72.

- 775 33. Jimenez-Morales D, Campos AR, Von Dollen J. 2019. artMS: Analytical R tools for Mass  
776 Spectrometry. <https://bioconductor.org/packages/release/bioc/html/artMS.html>.  
777 Accessed 2020-02-01.
- 778 34. Choi M, Chang CY, Clough T, Broudy D, Killeen T, MacLean B, Vitek O. 2014. MSstats: an  
779 R package for statistical analysis of quantitative mass spectrometry-based proteomic  
780 experiments. *Bioinformatics* 30:2524-6.
- 781 35. Pristovsek P, Kidric J. 1999. Solution structure of polymyxins B and E and effect of  
782 binding to lipopolysaccharide: an NMR and molecular modeling study. *J Med Chem*  
783 42:4604-13.
- 784 36. Dominguez A, Munoz E, Lopez MC, Cordero M, Martinez JP, Vinas M. 2017.  
785 Transcriptomics as a tool to discover new antibacterial targets. *Biotechnol Lett* 39:819-  
786 828.
- 787 37. Briffotiaux J, Liu S, Gicquel B. 2019. Genome-Wide Transcriptional Responses of  
788 *Mycobacterium* to Antibiotics. *Front Microbiol* 10:249.
- 789 38. Price NL, Raivio TL. 2009. Characterization of the Cpx regulon in *Escherichia coli* strain  
790 MC4100. *J Bacteriol* 191:1798-815.
- 791 39. Mitchell AM, Silhavy TJ. 2019. Envelope stress responses: balancing damage repair and  
792 toxicity. *Nat Rev Microbiol* 17:417-428.
- 793 40. Jishage M, Iwata A, Ueda S, Ishihama A. 1996. Regulation of RNA polymerase sigma  
794 subunit synthesis in *Escherichia coli*: intracellular levels of four species of sigma subunit  
795 under various growth conditions. *J Bacteriol* 178:5447-51.
- 796 41. Sun Z, Cagliero C, IZard J, Chen Y, Zhou YN, Heinz WF, Schneider TD, Jin DJ. 2019. Density  
797 of sigma70 promoter-like sites in the intergenic regions dictates the redistribution of  
798 RNA polymerase during osmotic stress in *Escherichia coli*. *Nucleic Acids Res* 47:3970-  
799 3985.
- 800 42. Erickson JW, Gross CA. 1989. Identification of the sigma E subunit of *Escherichia coli*  
801 RNA polymerase: a second alternate sigma factor involved in high-temperature gene  
802 expression. *Genes Dev* 3:1462-71.
- 803 43. Alba BM, Gross CA. 2004. Regulation of the *Escherichia coli* sigma-dependent envelope  
804 stress response. *Mol Microbiol* 52:613-9.
- 805 44. Nonaka G, Blankschien M, Herman C, Gross CA, Rhodius VA. 2006. Regulon and  
806 promoter analysis of the *E. coli* heat-shock factor, sigma32, reveals a multifaceted  
807 cellular response to heat stress. *Genes Dev* 20:1776-89.
- 808 45. Rolfes RJ, Zalkin H. 1988. *Escherichia coli* gene purR encoding a repressor protein for  
809 purine nucleotide synthesis. Cloning, nucleotide sequence, and interaction with the purF  
810 operator. *J Biol Chem* 263:19653-61.
- 811 46. Cho BK, Federowicz SA, Embree M, Park YS, Kim D, Palsson BO. 2011. The PurR regulon  
812 in *Escherichia coli* K-12 MG1655. *Nucleic Acids Res* 39:6456-64.
- 813 47. Lamarche MG, Wanner BL, Crepin S, Harel J. 2008. The phosphate regulon and bacterial  
814 virulence: a regulatory network connecting phosphate homeostasis and pathogenesis.  
815 *FEMS Microbiol Rev* 32:461-73.
- 816 48. Silvis MR, Gross CA. In preparation.
- 817 49. Peters JM, Colavin A, Shi H, Czarny TL, Larson MH, Wong S, Hawkins JS, Lu CHS, Koo BM,  
818 Marta E, Shiver AL, Whitehead EH, Weissman JS, Brown ED, Qi LS, Huang KC, Gross CA.  
819 2016. A Comprehensive, CRISPR-based Functional Analysis of Essential Genes in  
820 Bacteria. *Cell* 165:1493-1506.

- 821 50. Metzger LEt, Raetz CR. 2009. Purification and characterization of the lipid A disaccharide  
822 synthase (LpxB) from *Escherichia coli*, a peripheral membrane protein. *Biochemistry*  
823 48:11559-71.
- 824 51. Narita S, Tokuda H. 2009. Biochemical characterization of an ABC transporter LptBFGC  
825 complex required for the outer membrane sorting of lipopolysaccharides. *FEBS Lett*  
826 583:2160-4.
- 827 52. Bergler H, Fuchsbichler S, Hogenauer G, Turnowsky F. 1996. The enoyl-[acyl-carrier-  
828 protein] reductase (FabI) of *Escherichia coli*, which catalyzes a key regulatory step in  
829 fatty acid biosynthesis, accepts NADH and NADPH as cofactors and is inhibited by  
830 palmitoyl-CoA. *Eur J Biochem* 242:689-94.
- 831 53. Heath RJ, Rock CO. 1995. Enoyl-acyl carrier protein reductase (fabI) plays a determinant  
832 role in completing cycles of fatty acid elongation in *Escherichia coli*. *J Biol Chem*  
833 270:26538-42.
- 834 54. Rawlings M, Cronan JE, Jr. 1992. The gene encoding *Escherichia coli* acyl carrier protein  
835 lies within a cluster of fatty acid biosynthetic genes. *J Biol Chem* 267:5751-4.
- 836 55. Heath RJ, Rock CO. 1996. Roles of the FabA and FabZ beta-hydroxyacyl-acyl carrier  
837 protein dehydratases in *Escherichia coli* fatty acid biosynthesis. *J Biol Chem* 271:27795-  
838 801.
- 839 56. Biswas T, Yi L, Aggarwal P, Wu J, Rubin JR, Stuckey JA, Woodard RW, Tsodikov OV. 2009.  
840 The tail of KdsC: conformational changes control the activity of a haloacid dehalogenase  
841 superfamily phosphatase. *J Biol Chem* 284:30594-603.
- 842 57. Turner J, Cho Y, Dinh NN, Waring AJ, Lehrer RI. 1998. Activities of LL-37, a cathelin-  
843 associated antimicrobial peptide of human neutrophils. *Antimicrob Agents Chemother*  
844 42:2206-14.
- 845 58. Hajj Chegade M, Pelosi L, Fyfe CD, Loiseau L, Rascalou B, Brugiere S, Kazemzadeh K, Vo  
846 CD, Ciccone L, Aussel L, Coute Y, Fontecave M, Barras F, Lombard M, Pierrel F. 2019. A  
847 Soluble Metabolon Synthesizes the Isoprenoid Lipid Ubiquinone. *Cell Chem Biol* 26:482-  
848 492 e7.
- 849 59. Jackson M. 2014. The mycobacterial cell envelope-lipids. *Cold Spring Harb Perspect Med*  
850 4.
- 851 60. Raivio TL. 2014. Everything old is new again: an update on current research on the Cpx  
852 envelope stress response. *Biochim Biophys Acta* 1843:1529-41.
- 853 61. Audrain B, Ferrieres L, Zairi A, Soubigou G, Dobson C, Coppee JY, Beloin C, Ghigo JM.  
854 2013. Induction of the Cpx envelope stress pathway contributes to *Escherichia coli*  
855 tolerance to antimicrobial peptides. *Appl Environ Microbiol* 79:7770-9.
- 856 62. Weatherspoon-Griffin N, Zhao G, Kong W, Kong Y, Morigen, Andrews-Polymeris H,  
857 McClelland M, Shi Y. 2011. The CpxR/CpxA two-component system up-regulates two  
858 Tat-dependent peptidoglycan amidases to confer bacterial resistance to antimicrobial  
859 peptide. *J Biol Chem* 286:5529-39.
- 860 63. Zampieri M, Zimmermann M, Claassen M, Sauer U. 2017. Nontargeted Metabolomics  
861 Reveals the Multilevel Response to Antibiotic Perturbations. *Cell Rep* 19:1214-1228.
- 862 64. Yang JH, Wright SN, Hamblin M, McCloskey D, Alcantar MA, Schrubbers L, Lopatkin AJ,  
863 Satish S, Nili A, Palsson BO, Walker GC, Collins JJ. 2019. A White-Box Machine Learning  
864 Approach for Revealing Antibiotic Mechanisms of Action. *Cell* 177:1649-1661 e9.
- 865 65. Farris C, Sanowar S, Bader MW, Pfuetzner R, Miller SI. 2010. Antimicrobial peptides  
866 activate the Rcs regulon through the outer membrane lipoprotein RcsF. *J Bacteriol*  
867 192:4894-903.

- 868 66. Konovalova A, Mitchell AM, Silhavy TJ. 2016. A lipoprotein/beta-barrel complex  
869 monitors lipopolysaccharide integrity transducing information across the outer  
870 membrane. *Elife* 5.
- 871 67. Zheng W, Sun W, Simeonov A. 2018. Drug repurposing screens and synergistic drug-  
872 combinations for infectious diseases. *Br J Pharmacol* 175:181-191.
- 873 68. Zimmermann GR, Lehar J, Keith CT. 2007. Multi-target therapeutics: when the whole is  
874 greater than the sum of the parts. *Drug Discov Today* 12:34-42.
- 875 69. Moellering RC, Jr. 1983. Rationale for use of antimicrobial combinations. *Am J Med* 75:4-  
876 8.
- 877 70. Heath RJ, Rubin JR, Holland DR, Zhang E, Snow ME, Rock CO. 1999. Mechanism of  
878 triclosan inhibition of bacterial fatty acid synthesis. *J Biol Chem* 274:11110-4.
- 879 71. Bohl TE, Shi K, Lee JK, Aihara H. 2018. Crystal structure of lipid A disaccharide synthase  
880 LpxB from *Escherichia coli*. *Nat Commun* 9:377.

881

882 **FIGURE LEGENDS**

883 **FIGURE 1. Ceragenins kills phylogenetically diverse bacteria.** (A) Structures of the  
884 ceragenins CSA13 and CSA131. Minimal inhibitory concentrations (MIC) of colistin  
885 (COL), LL37, CSA13, CSA131 and ciprofloxacin (CIP) against *E. coli* MG1655 (B), *L.*  
886 *monocytogenes* (Lmo) 10403S (C), *M. avium* mc<sup>2</sup>2500 (D), *M. avium* mc<sup>2</sup>2500D6 (E), *M.*  
887 *marinum* M strain (F), *M. smegmatis* mc<sup>2</sup>155 (G) and *M. tuberculosis* Erdman (H). Dots  
888 and bars indicate results from independent experiments and median values, respectively.  
889 Time-kill experiments of *E. coli* MG1655 (I), *L. monocytogenes* 10403S (J) and *M.*  
890 *smegmatis* mc<sup>2</sup>155 (K) exposed to colistin (in red), LL37 (in blue), CSA13 (in yellow),  
891 CSA131 (in green), ciprofloxacin (in purple) and/or erythromycin (ERY; in orange), a  
892 bacteriostatic antibiotic. Untreated samples are in black and results are showed as means  
893 of two independent experiments. Shaded areas show standard error of the mean (SEM).  
894 Serial passages of *E. coli* (L) and *L. monocytogenes* (M) exposed to CSA13 (in yellow),  
895 CSA131 (in green) and ciprofloxacin (in purple). Bacteria were passaged daily in  
896 presence of sub-inhibitory concentrations of antibiotics. Results are expressed as means  
897 and SEM of two independent experiments.

898

899 **FIGURE 2. Transcriptomic response of *E. coli* exposed to ceragenins.** RNA from  
900 exponentially growing *E. coli* bacteria exposed to supra-MIC concentrations of colistin  
901 (COL), LL37, CSA13 and CSA131 was extracted and sequenced. (A-D) Replica plots  
902 showing the log<sub>10</sub> of normalized number of reads per gene for bacteria exposed to  
903 antibiotics. Correlation coefficients (R) between replicates #1 and #2 (●) and #1 and #3  
904 (●) are displayed. (E-H) Volcano plots that represent RNA expression as means of log<sub>2</sub>



905 fold changes and  $-\log_{10}$  adjusted  $P_{\text{values}}$  (adj.  $P_{\text{value}}$ ) for bacteria exposed to antibiotics in  
906 comparison to untreated control samples. Horizontal and vertical dotted red lines indicate  
907 adjusted  $P$  values less than 0.05 (or  $-\log_{10}$  (adj.  $P_{\text{value}}$ ) greater than 1.3) and absolute  $\log_2$   
908 fold changes greater than 1. (I) Multidimensional scaling (MDS) plot showing the  
909 separation between biological replicates and between untreated and antibiotic-treated  
910 samples. (J) Annotation terms enriched for genes significantly up-regulated ( $\log_2 \text{FC} > 1$   
911 and adj.  $P_{\text{value}} < 0.05$ ) following exposure to antibiotics. (K) Annotation terms enriched  
912 for genes significantly down-regulated ( $\log_2 \text{FC} < -1$  and adj.  $P_{\text{value}} < 0.05$ ) following  
913 exposure to antibiotics. Adjusted  $P_{\text{values}}$  of annotation terms associated with a false  
914 discovery rate (FDR) value  $> 0.05$  for at least one antibiotic are showed. Only the 8 most  
915 statistically significant annotation terms are showed for each conditions. Annotation  
916 terms are abbreviated and/or modified for a purpose of presentation (see Data Set S2 for a  
917 more detailed information). Data are from 3 independent experiments.

918

919 **FIGURE 3. Identification of pathways defining the transcriptional response of *E.***

920 ***coli* to ceragenins.** (A) Venn diagram analysis of genes significantly up-regulated ( $\log_2$   
921  $\text{FC} > 1$  and adjusted  $P_{\text{value}} < 0.05$ ) in *E. coli* exposed to antibiotics. Annotation terms  
922 associated with a false discovery rate (FDR) value  $> 0.05$  for genes up-regulated by all  
923 antibiotics, by CAMPs or by ceragenins are shown by dotted arrows. (B) Top 25 most  
924 up-regulated genes for bacteria exposed to all antibiotics, to CAMPs or to ceragenins.  
925 Genes belonging to the annotation terms «signal» (in red), «LPS», «colanic acid», «slime  
926 layer» and «exopolysaccharide» (in blue) and «phosphate transport» (in green) are  
927 indicated. (C) Venn diagram analysis of genes significantly down-regulated ( $\log_2 \text{FC} < -1$

928 and adjusted  $P_{\text{value}} < 0.05$ ) in *E. coli* exposed to antibiotics. Annotation terms associated  
929 with a false discovery rate (FDR) value  $> 0.05$  for genes down-regulated by all  
930 antibiotics, by CAMPs or by ceragenins are shown by dotted arrows. (D) Top 25 most  
931 down-regulated genes for bacteria exposed to all antibiotics or to ceragenins. Genes  
932 belonging to the annotation terms «de novo IMP», «de novo UMP», «purine» and  
933 «pyrimidine» (in orange) and «oligo/dipeptide transport» (in purple) are indicated.  
934 Annotation terms are abbreviated and/or modified for the purpose of presentation (see  
935 Data Set S3 for a more detailed information). Data are from 3 independent experiments.  
936

937 **FIGURE 4. Identification of cis-acting elements that regulate the transcriptional**  
938 **response of *E. coli* to ceragenins.** Genes with known or predicted promoters or binding  
939 sites for transcription factors are enumerated for genes commonly up-regulated (A) or  
940 down-regulated (B) by all antibiotics (black bars), by CAMPs (red bars) or by ceragenins  
941 (in blue). Only promoters/binding sites identified more than once for at least one group  
942 are represented.

943  
944 **FIGURE 5. Expression of the CpxR, PurR, RcsA and PhoB regulons in *E. coli***  
945 **exposed to ceragenins.** Heat maps of  $\log_2$  fold changes for genes of the CpxR (A), PurR  
946 (B), RcsA (C) and PhoB (D) regulons in bacteria exposed to antibiotics. Genes predicted  
947 to be induced (in black), repressed (in blue) or both (in orange) by a specific transcription  
948 factors are indicated. Data are from 3 independent experiments.

949



950 **FIGURE 6. Proteomic response of *E. coli* exposed to colistin and CSA13.** (A)  
951 Number of unique proteins identified for each conditions. (B) Correlation coefficient (R)  
952 between the number of peptides per proteins between the biological replicates of  
953 untreated bacteria and bacteria exposed to colistin (COL) or CSA13. Data are represented  
954 as means and standard deviations. (C-D) Volcano plots that represent protein expression  
955 as means of  $\log_2$  fold changes and  $-\log_{10}$  adjusted  $P_{\text{values}}$  (adj.  $P_{\text{value}}$ ) for bacteria exposed  
956 to antibiotics in comparison to untreated controls. Horizontal and vertical dotted red lines  
957 indicate adjusted  $P$  values less than 0.05 (or  $-\log_{10}$  (adj.  $P_{\text{value}}$ ) greater than 1.3) and  
958 absolute  $\log_2$  fold changes greater than 1. Some proteins that are members of the Cpx  
959 regulon (in red), involved in colanic acid biosynthesis (in blue) or members of the PhoB  
960 regulon (in green) are highlighted. (E) Annotation terms enriched for proteins  
961 significantly up- or down-regulated (absolute  $\log_2$  FC > 1 and adj.  $P_{\text{value}}$  < 0.05)  
962 following the exposure of *E. coli* to colistin and CSA13. Adjusted  $P_{\text{values}}$  of annotation  
963 terms associated with a false discovery rate (FDR) value > 0.05 for at least one antibiotic  
964 are showed. Annotation terms are abbreviated and/or modified for the purpose of  
965 presentation (see Data Set S6 for a more detailed information). Data are from 3  
966 independent bacterial cultures for each conditions.

967

968 **FIGURE 7. Identification of the genetic determinants of resistance to ceragenins in**  
969 *E. coli*. (A) Details and calibration of the *E. coli* CRISPRi system. dCas9 and sgRNA  
970 expression cassettes were integrated into the chromosome (Tn7att and lambda att,  
971 respectively) and controlled by weak constitutive (dcas9) or inducible (sgRNA)  
972 promoters, as indicated. Right panels show that CRISPRi produces unimodal reduction in

973 expression when targeting chromosomal *rfp* (i.e. a gene encoding a red fluorescent  
974 protein). Median percentages of knockdown are indicated in the right lower panel. (B)  
975 Schematic of the pooled growth experiments of *E. coli* CRISPRi libraries in the presence  
976 or absence of antibacterial compounds. The strain-specific metrics of fitness and  
977 sensitivity (drug-specific) are calculated as the change in relative abundance of each  
978 strain between the two time points or conditions, using the formulae as indicated.  
979 Changes in abundance ( $\text{Log}_2\text{FC}$ ) and adjusted  $P_{\text{values}}$  ( $-\text{Log}_{10}(\text{adj. } P_{\text{value}})$ ) associated with  
980 each strain following exposure to colistin (COL) (C), LL37 (D), CSA13 (E) and CSA131  
981 (F) are shown. Horizontal and vertical dotted red lines indicate adjusted  $P$  values less  
982 than 0.05 (or  $-\log_{10}(\text{adj. } P_{\text{value}})$  greater than 1.3) and absolute  $\log_2$  fold changes greater  
983 than 0.5. Genes associated with significant changes in abundance are labeled for each  
984 compounds. (G) Mean fold changes in abundance and standard deviations (SD)  
985 associated with significantly enriched or depleted CRISPRi strains (only one *rpoE*-  
986 targeting strain is shown) following exposure to COL, LL37, CSA13 and CSA131 (\*,  $P <$   
987 0.05 [Two-tailed unpaired  $t$ -test]). Means and SDs were calculated from counts  
988 normalized to the total number of counts for each conditions. Data are from two  
989 biological replicates.  
990  
991

992 **SUPPLEMENTAL MATERIALS**

993 **Supplement Table S1.** Minimal inhibitory concentrations (MIC) of colistin, LL37,

994 CSA13, CSA131, CSA44, CSA144 and ciprofloxacin against *E. coli*, *L. monocytogenes*

995 and *Mycobacterium* spp.

996 **Supplement Figure S1.** Supplementary information related to CRISPRi screening.

997 Schematic of two examples of deep sequencing libraries from the strategy used to

998 multiplex growth experiments using 50bp single end reads. Each library is barcoded

999 using aTruSeq i7 index (orange), and additionally incorporates a 4bp barcode (teal) that is

1000 read out by the TruSeq Read 1 primer. Each index (i7 and 4bp barcode) is introduced by

1001 the sequencing library PCR primers, enabling easy multiplexing. Library A incorporates

1002 a random offset at the start of Read 1 (NN) to ensure sequence diversity during cluster

1003 generation.

1004 **Data Set S1.** Transcriptomic response of *E. coli* exposed to colistin, LL37, CSA13 and

1005 CSA131 as determined by RNAseq. This file includes raw and normalized read counts,

1006 fold changes, *P* and adjusted *P* values as well as lists of genes significantly up- or down-

1007 regulated.

1008 **Data Set S2.** Annotation term enrichment analysis for significantly up- and down-

1009 regulated genes in *E. coli* exposed to colistin, LL37, CSA13 and CSA131. The analysis

1010 was performed with the DAVID Bioinformatics Resources using terms from UniProt

1011 keywords, COG ontology, GO and the KEGG pathway.

1012 **Data Set S3.** Lists and annotation term enrichment analysis of genes significantly up- and

1013 down-regulated in *E. coli* exposed to all antibiotics, CAMPs and ceragenins. The analysis

1014 was performed with the DAVID Bioinformatics Resources using terms from UniProt  
1015 keywords, COG ontology, GO and the KEGG pathway.

1016 **Data Set S4.** Analysis of cis-acting elements associated with genes significantly up- and  
1017 down-regulated in *E. coli* exposed to colistin, LL37, CSA13 and CSA131. This file  
1018 includes lists of genes with a least one binding site for sigma factors or transcription  
1019 factors as well as numbers of non-redundant binding sites for each conditions. Fold  
1020 changes for genes of the CpxR, PurR, RcsA and PhoB regulons are also included.

1021 **Data Set S5.** Proteomic response of *E. coli* exposed to colistin and CSA13. This file  
1022 includes fold changes and adjusted *P* values (including imputed values) as well as lists of  
1023 proteins significantly up- and down-regulated following exposure to colistin and CSA13.

1024 **Data Set S6.** Annotation term enrichment analysis for proteins up- and down-regulated in  
1025 *E. coli* exposed to colistin or CSA13. The analysis was performed with the DAVID  
1026 Bioinformatics Resources using terms from UniProt keywords, COG ontology, GO and  
1027 the KEGG pathway.

1028 **Data Set S7.** Changes in abundance and statistical significance associated with each  
1029 strains of the CRISPRi library following exposure to colistin, LL37, CSA13 and  
1030 CSA131.

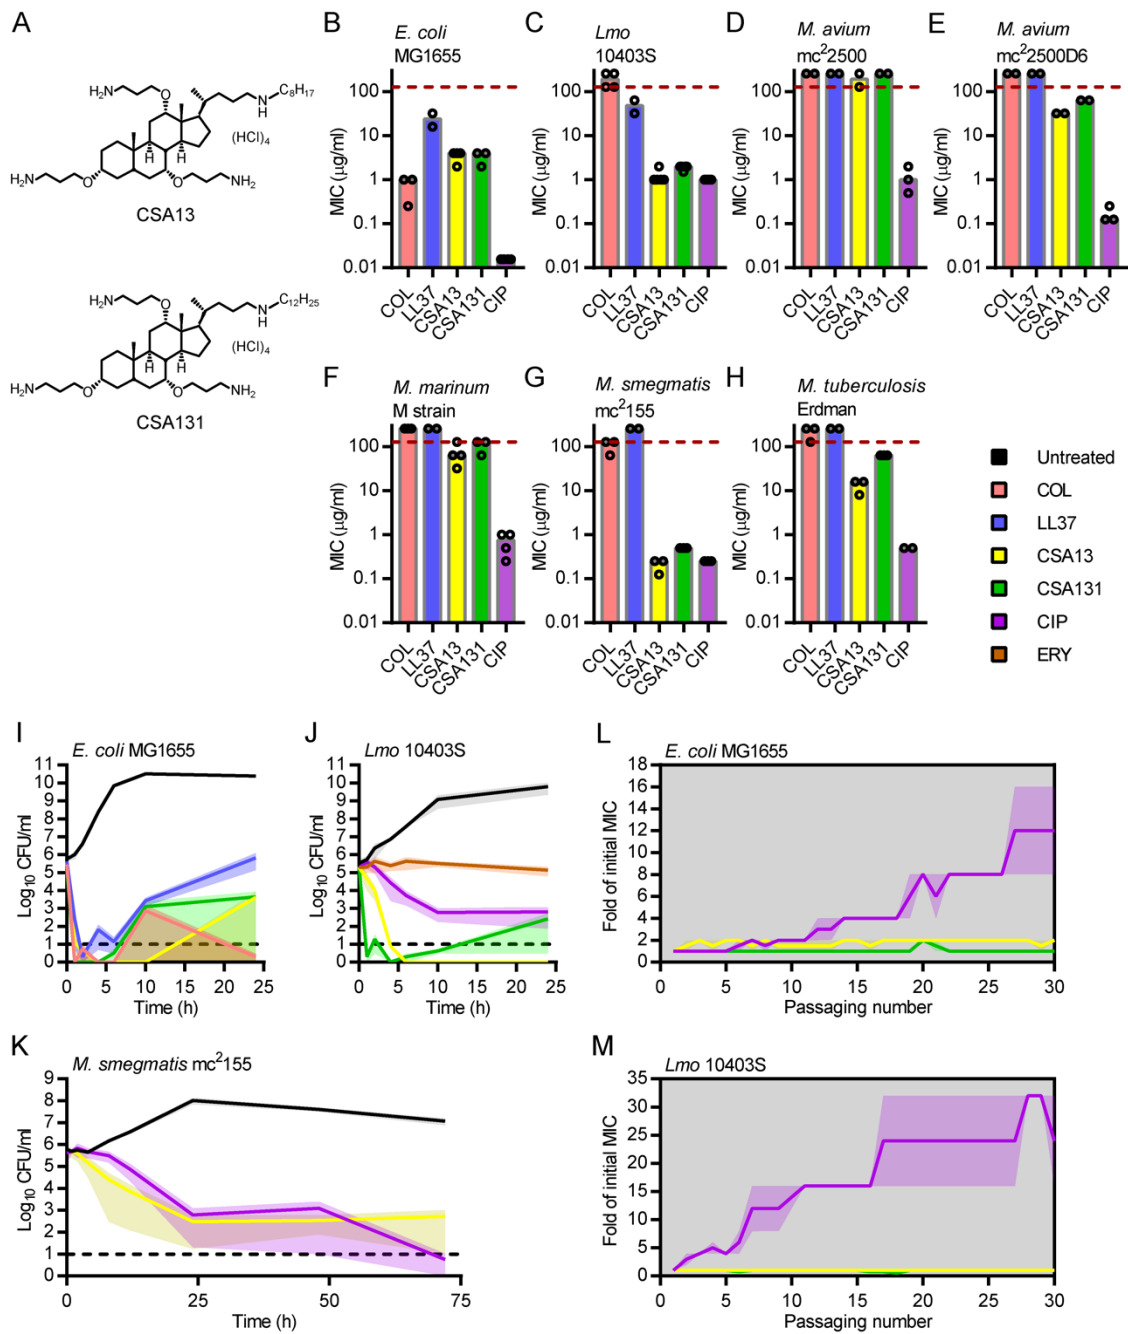

**FIGURE 1.**

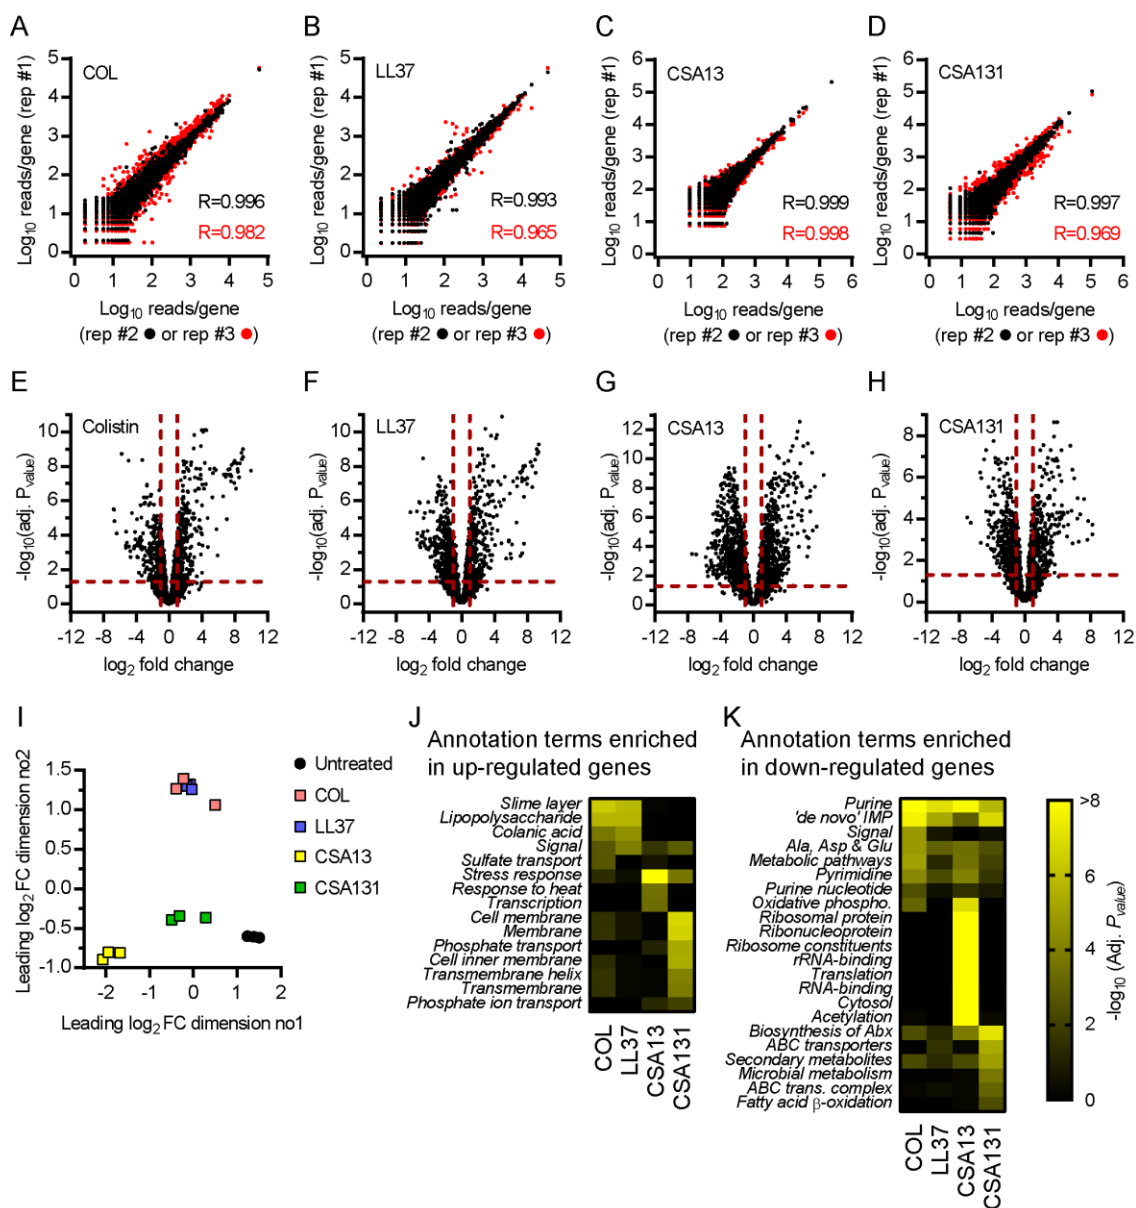

FIGURE 2.

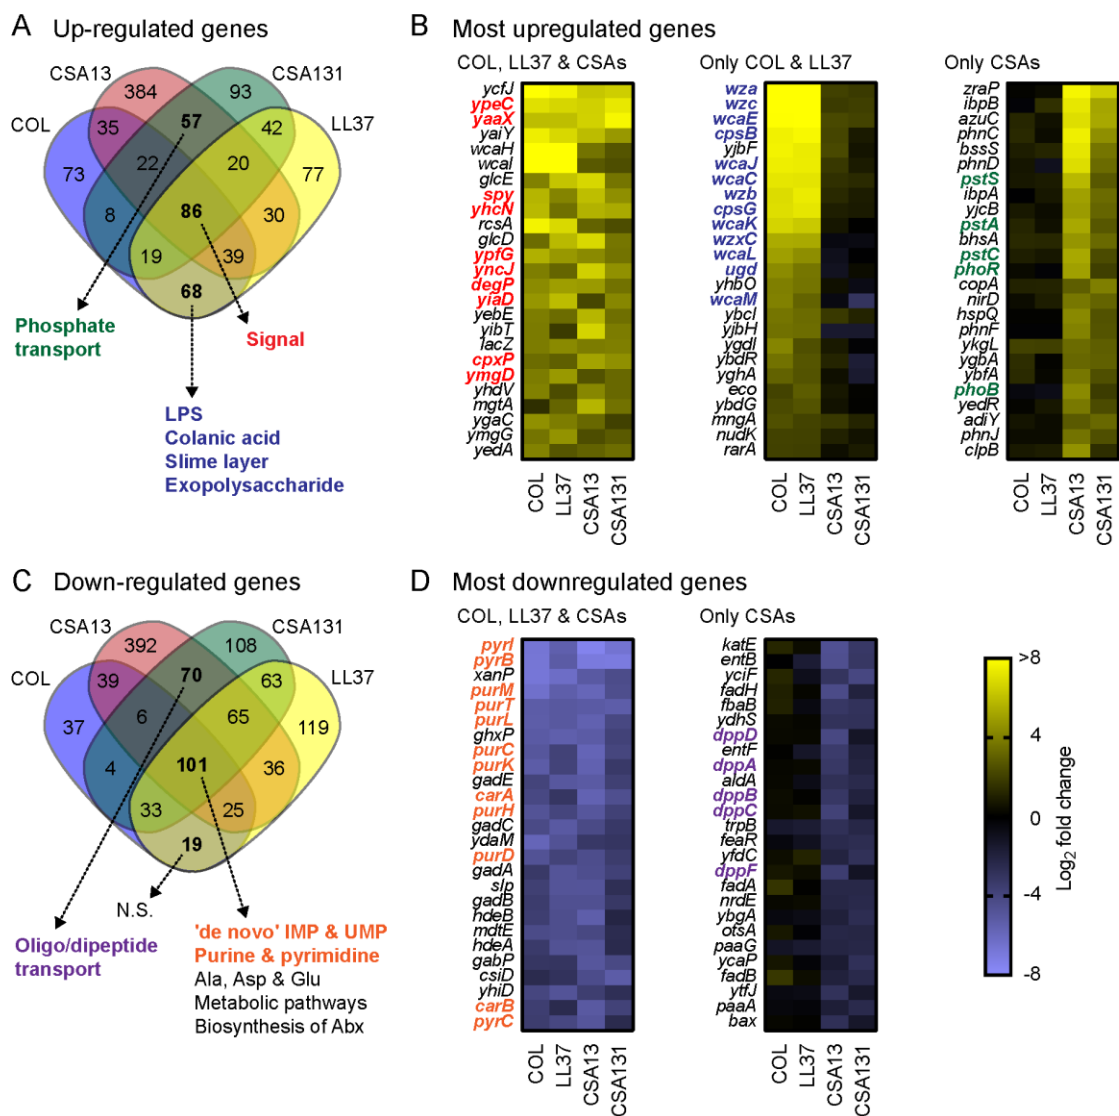

FIGURE 3.

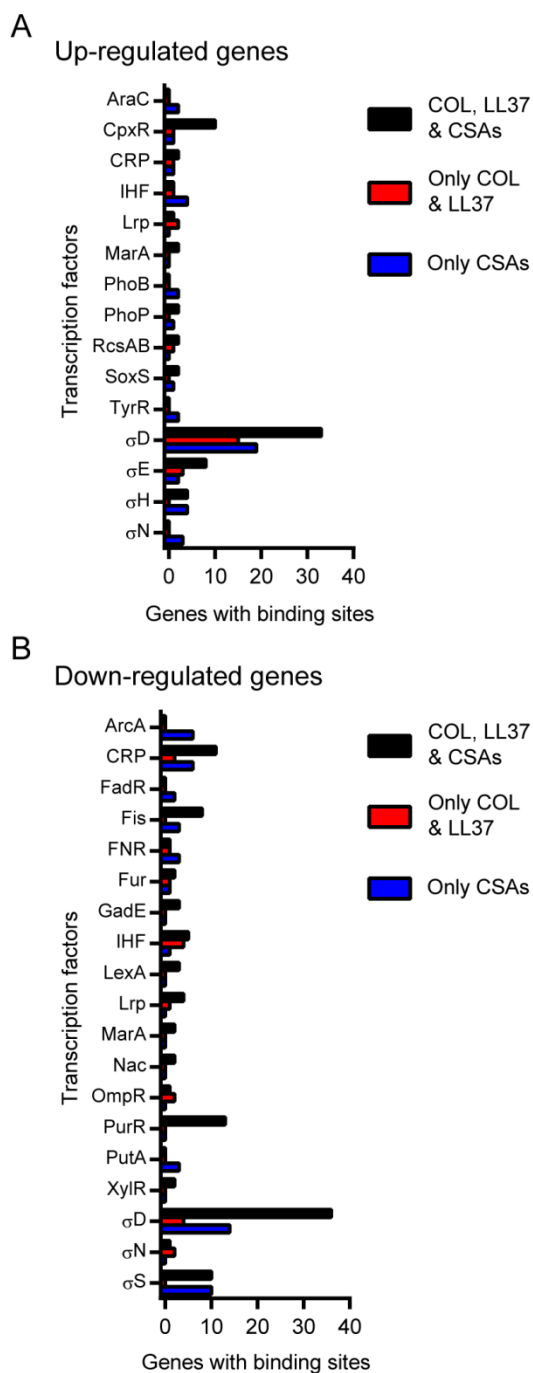

**FIGURE 4.**



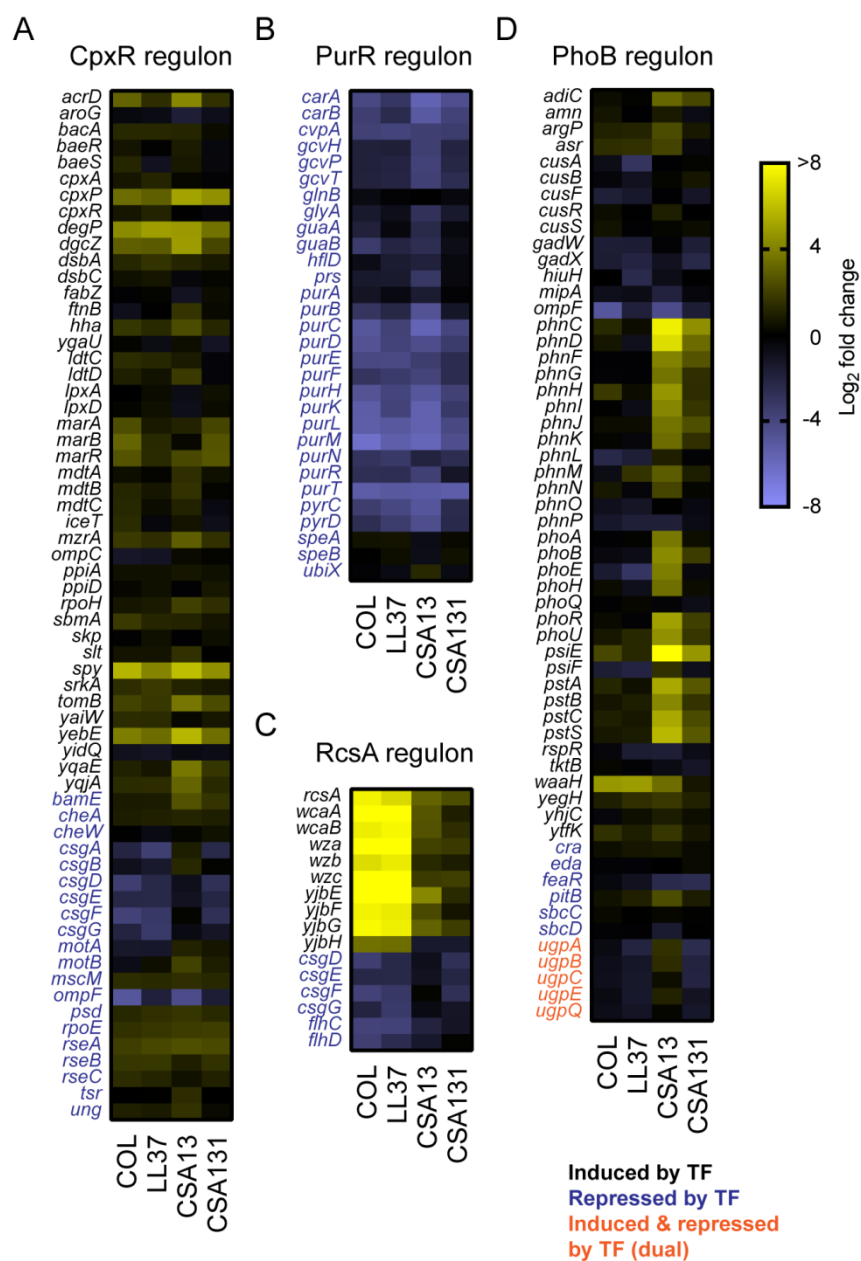

**FIGURE 5**

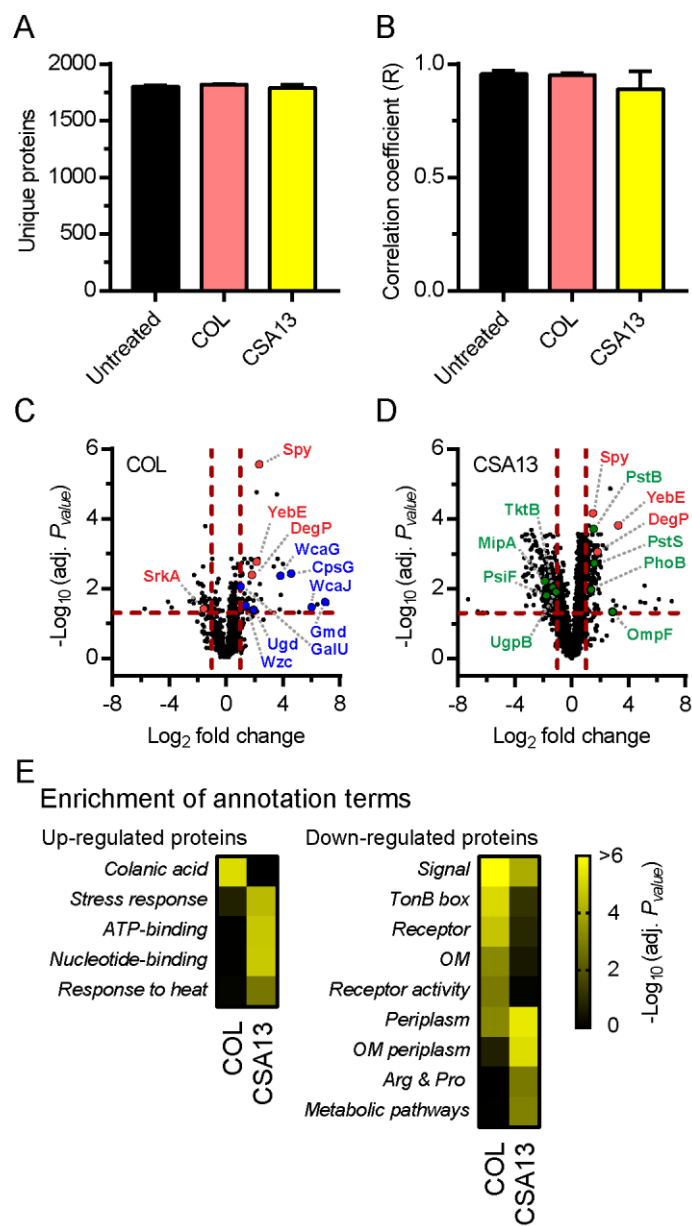

**FIGURE 6.**

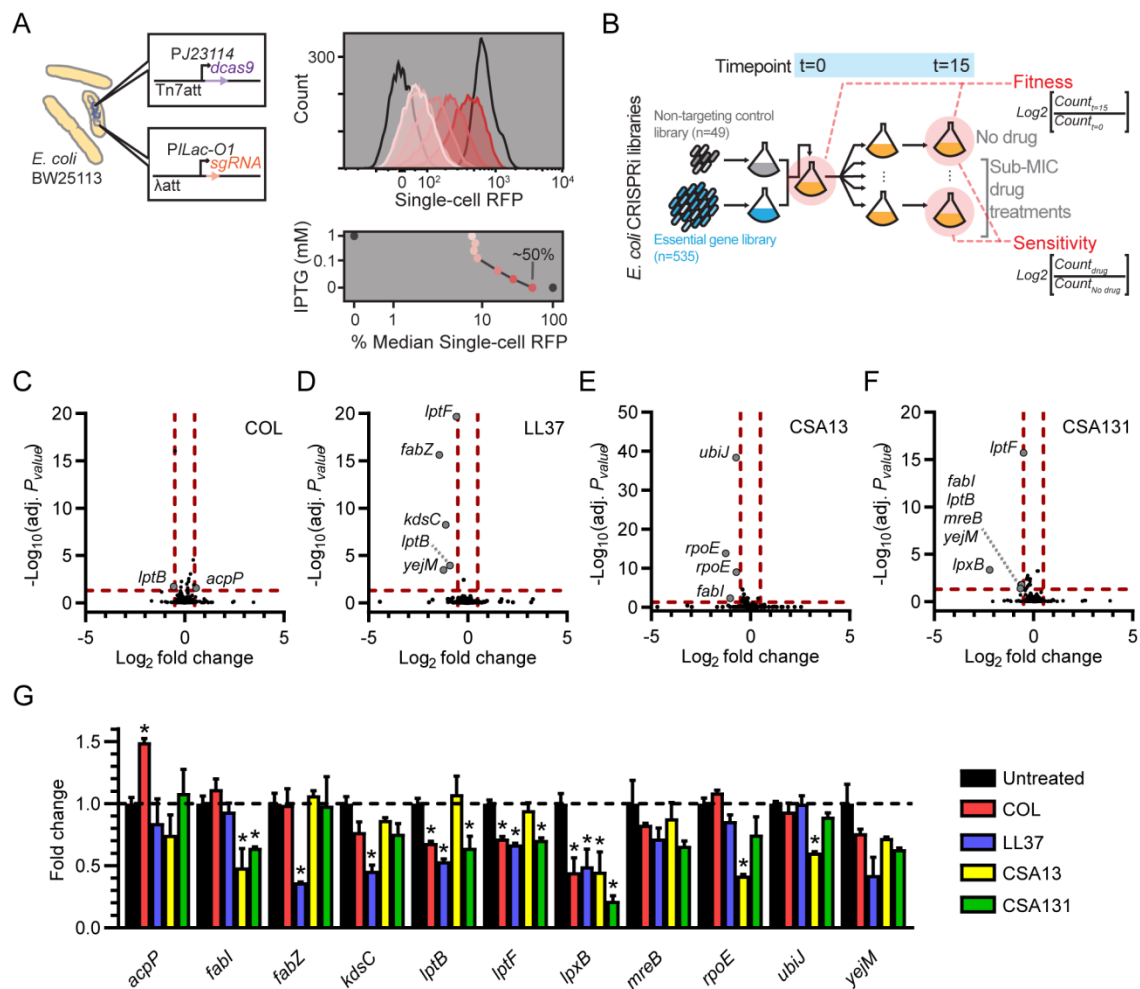

**FIGURE 7.**
